# Supplementary material for: Alkyl Grignard cross-coupling of aryl phosphates catalyzed by new, highly active ionic iron(ii) complexes containing a phosphine ligand and an imidazolium cation
Source: Royal Society of Chemistry journal article supplement (doi:10.1039/c6dt02995g), 2016-01-01
Supplement: c6dt02995g1.pdf [file c6dt02995g1.pdf]

## Supporting Information

### **Alkyl Grignard cross-coupling of aryl phosphates catalyzed by new, highly active ionic iron(II) complexes containing a phosphine ligand and an imidazolium cation**

Zhuang Li, Ling Liu, Hong-mei Sun,\* Qi Shen and Yong Zhang

The Key Laboratory of Organic Synthesis of Jiangsu Province, College of Chemistry, Chemical Engineering and Materials Science, Soochow University, Suzhou 215123, People's Republic of China

\*Corresponding author

Received date (automatically inserted by publisher); E-mail: [sunhm@suda.edu.cn](mailto:sunhm@suda.edu.cn) (H.-M. Sun)

**Page S2–S4: X-ray Crystallographic Data for Iron(II) complexes**

**Page S5: Typical procedures of attempts to synthesize the corresponding neutral iron(II) complex containing both a phosphine ligand and an NHC ligand**

**Page S6–S11: Spectral Data of Cross-Coupling Products**

**Page S12–S44: Copies of NMR Spectra for All Compounds**

**Page S45: References**

**X-ray Structural Determination.** Single crystals of **1–6** for X-ray diffraction studies were sealed in a thin-walled glass capillary. The data were collected on a Rigaku Mercury CCD area detector at 293(2) K (**1**, **3**, **4** and **5**), 273(2) K (**2**) and 173(2) K (**6**). Structures were solved by direct methods and refined by full-matrix least-squares procedures based on  $F^2$  using SHELXS-97 and SHELXL-97 programs. All non-hydrogen atoms were refined anisotropically. Hydrogen atoms were assigned to idealized positions and were included in structure factor calculations.

**Table S1 X-ray Crystallographic Data for 1–3**

|                                                                             | <b>1·THF</b>                                                                    | <b>2</b>                                                           | <b>3·3THF</b>                                                                     |
|-----------------------------------------------------------------------------|---------------------------------------------------------------------------------|--------------------------------------------------------------------|-----------------------------------------------------------------------------------|
| Formula                                                                     | C <sub>35</sub> H <sub>53</sub> Cl <sub>3</sub> FeN <sub>2</sub> O <sub>2</sub> | C <sub>45</sub> H <sub>52</sub> Cl <sub>3</sub> FeN <sub>2</sub> P | C <sub>57</sub> H <sub>94</sub> Cl <sub>3</sub> FeN <sub>2</sub> O <sub>3</sub> P |
| Formula weight                                                              | 695.99                                                                          | 814.06                                                             | 1048.51                                                                           |
| Temperature / K                                                             | 293(2)                                                                          | 273(2)                                                             | 293(2)                                                                            |
| Radiation used                                                              | Mo-Ka                                                                           | Mo-Ka                                                              | Mo-Ka                                                                             |
| Crystal system                                                              | Monoclinic                                                                      | Orthorhombic                                                       | Orthorhombic                                                                      |
| Space group                                                                 | <i>P21/c</i>                                                                    | <i>Pna2<sub>1</sub></i>                                            | <i>Pnma</i>                                                                       |
| Unit cell dimensions                                                        |                                                                                 |                                                                    |                                                                                   |
| <i>a</i> / Å                                                                | 12.168 (2)                                                                      | 17.2349(13)                                                        | 17.6972(7)                                                                        |
| <i>b</i> / Å                                                                | 32.246(6)                                                                       | 14.0856(9)                                                         | 16.5426(7)                                                                        |
| <i>c</i> / Å                                                                | 9.841(2)                                                                        | 17.5383(13)                                                        | 22.9862(10)                                                                       |
| $\beta$ / °                                                                 | 96.59(3)                                                                        | 90                                                                 | 90                                                                                |
| <i>V</i> / Å <sup>3</sup>                                                   | 3835.7(13)                                                                      | 4257.7(5)                                                          | 6729.4(5)                                                                         |
| <i>Z</i>                                                                    | 4                                                                               | 4                                                                  | 4                                                                                 |
| <i>D<sub>c</sub></i> / g cm <sup>-3</sup>                                   | 1.205                                                                           | 1.270                                                              | 1.035                                                                             |
| $\mu$ / mm <sup>-1</sup>                                                    | 0.632                                                                           | 0.573                                                              | 0.403                                                                             |
| <i>F</i> (000)                                                              | 1480                                                                            | 2398                                                               | 2264                                                                              |
| $\theta$ range / °                                                          | 2.82-25.00                                                                      | 2.89-27.50                                                         | 2.86-25.00                                                                        |
| Reflection collected                                                        | 22584                                                                           | 29854                                                              | 32299                                                                             |
| Independent reflections, <i>R</i> <sub>int</sub>                            | 6751, 0.0298                                                                    | 9027, 0.0319                                                       | 6146, 0.0796                                                                      |
| Goodness-of-fit on <i>F</i> <sup>2</sup>                                    | 0.989                                                                           | 1.163                                                              | 1.198                                                                             |
| <i>R</i> <sub>1</sub> , <i>wR</i> <sub>2</sub> [ <i>I</i> > 2σ( <i>I</i> )] | 0.0528, 0.1213                                                                  | 0.0524, 0.1474                                                     | 0.1008, 0.3036                                                                    |
| <i>R</i> <sub>1</sub> , <i>wR</i> <sub>2</sub> (all data)                   | 0.0688, 0.1288                                                                  | 0.0542, 0.1528                                                     | 0.1402, 0.3424                                                                    |

**Table S2 X-ray Crystallographic Data for 4–6**

|                                                                             | <b>4</b>                                                           | <b>5·THF</b>                                                        | <b>6·2THF</b>                                                                     |
|-----------------------------------------------------------------------------|--------------------------------------------------------------------|---------------------------------------------------------------------|-----------------------------------------------------------------------------------|
| Formula                                                                     | C <sub>45</sub> H <sub>52</sub> Br <sub>3</sub> FeN <sub>2</sub> P | C <sub>49</sub> H <sub>78</sub> Br <sub>3</sub> FeN <sub>2</sub> OP | C <sub>47</sub> H <sub>74</sub> Br <sub>3</sub> FeN <sub>2</sub> O <sub>2</sub> P |
| Formula weight                                                              | 947.44                                                             | 1037.65                                                             | 1025.63                                                                           |
| Temperature / K                                                             | 293(2)                                                             | 293(2)                                                              | 173(2)                                                                            |
| Radiation used                                                              | Mo-Ka                                                              | Mo-Ka                                                               | Mo-Ka                                                                             |
| Crystal system                                                              | Monoclinic                                                         | Orthorhombic                                                        | triclinic                                                                         |
| Space group                                                                 | <i>Pna21</i>                                                       | <i>P2<sub>1</sub>2<sub>1</sub>2<sub>1</sub></i>                     | <i>P-1</i>                                                                        |
| Unit cell dimensions                                                        |                                                                    |                                                                     |                                                                                   |
| <i>a</i> / Å                                                                | 17.4631(9)                                                         | 14.7396(4)                                                          | 11.3255(4)                                                                        |
| <i>b</i> / Å                                                                | 14.2501(5)                                                         | 15.5290(5)                                                          | 13.2264(5)                                                                        |
| <i>c</i> / Å                                                                | 17.9938(10)                                                        | 23.4470(5)                                                          | 18.6540(9)                                                                        |
| $\beta$ / °                                                                 | 90                                                                 | 90                                                                  | 102.8                                                                             |
| <i>V</i> / Å <sup>3</sup>                                                   | 4477.8(4)                                                          | 5366.8(3)                                                           | 2554.82(18)                                                                       |
| <i>Z</i>                                                                    | 4                                                                  | 4                                                                   | 2,                                                                                |
| <i>D<sub>c</sub></i> / g cm <sup>-3</sup>                                   | 1.405                                                              | 1.279                                                               | 1.333                                                                             |
| $\mu$ / mm <sup>-1</sup>                                                    | 3.081                                                              | 2.577                                                               | 2.708                                                                             |
| <i>F</i> (000)                                                              | 1928                                                               | 2144                                                                | 1064                                                                              |
| $\theta$ range / °                                                          | 2.86-25.00                                                         | 2.90-25.00                                                          | 2.91-25.00                                                                        |
| Reflection collected                                                        | 17111                                                              | 24539                                                               | 23091                                                                             |
| Independent reflections, <i>R</i> <sub>int</sub>                            | 6816, 0.0491                                                       | 9306, 0.0484                                                        | 9001, 0.0555                                                                      |
| Goodness-of-fit on <i>F</i> <sup>2</sup>                                    | 1.013                                                              | 1.026                                                               | 1.068                                                                             |
| <i>R</i> <sub>1</sub> , <i>wR</i> <sub>2</sub> [ <i>I</i> > 2σ( <i>I</i> )] | 0.0540, 0.1179                                                     | 0.0444, 0.0844                                                      | 0.0782, 0.2018                                                                    |
| <i>R</i> <sub>1</sub> , <i>wR</i> <sub>2</sub> (all data)                   | 0.0870, 0.1347                                                     | 0.0789, 0.0965                                                      | 0.1340, 0.2405                                                                    |

**Typical procedures of attempts to synthesize the corresponding neutral iron(II) complex containing both a phosphine ligand and an NHC ligand**

A Schlenk flask was charged with  $[\text{H}^i\text{Pr}][\text{Fe}(\text{PPh}_3)_3\text{Br}_3]$  (**4**) or  $[\text{H}^i\text{Pr}][\text{Fe}(\text{PCy}_3)_3\text{Br}_3]$  (**5**) (1.80 mmol), THF (40.0 mL), and a stirring bar. To this solution was added dropwise a hexane or THF solution of bases (1.80 mmol) at 0 °C. The resulting solution changed color from yellow to pale gray immediately. The reaction mixture was stirred for 0.5 h and slowly warmed to room temperature for an additional 4 h. The reaction solution was filtered, and evaporated to dryness. The residue was washed with hexane ( $3 \times 10.0$  mL), extracted with toluene ( $3 \times 10.0$  mL), and crystallized from concentrated toluene at 0 °C. The target iron(II) complex,  $\text{Fe}(\text{PPh}_3)(\text{IPr})\text{Br}_2$ , was unsuccessfully isolated, but  $[\text{H}^i\text{Pr}][\text{Fe}(\text{IPr})\text{Br}_3] \cdot \text{C}_7\text{H}_8^1$  was unexpectedly isolated from concentrated toluene solution.

## Spectral data of the cross-coupling products

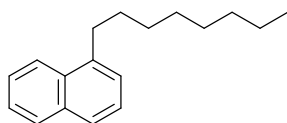

**1-octylnaphthalene (3ab).**<sup>2</sup>  $^1\text{H}$  NMR (400 MHz,  $\text{CDCl}_3$ )  $\delta$  = 0.88 (t,  $J$  = 6.5 Hz, 3H), 1.25–1.46 (m, 10H), 1.70–1.78 (m, 2H), 3.05 (t,  $J$  = 7.8 Hz, 2H), 7.30 (d,  $J$  = 6.8 Hz, 1H), 7.38 (t,  $J$  = 7.5 Hz, 1H), 7.43–7.50 (m, 2H), 7.69 (d,  $J$  = 8.1 Hz, 1H), 7.83 (d,  $J$  = 7.6 Hz, 1H), 8.04 (d,  $J$  = 8.1 Hz, 1H).  $^{13}\text{C}$  NMR (100 MHz,  $\text{CDCl}_3$ )  $\delta$  = 13.7, 22.3, 28.9, 29.1, 29.4, 30.4, 31.5, 32.7, 123.5, 124.9, 125.08, 125.15, 125.4, 125.9, 128.3, 131.5, 133.4, 138.6.

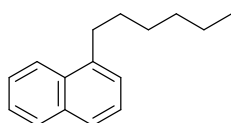

**1-hexylnaphthalene (3ac).**<sup>3</sup>  $^1\text{H}$  NMR (400 MHz,  $\text{CDCl}_3$ )  $\delta$  = 0.88 (t,  $J$  = 7.0 Hz, 3H), 1.25–1.45 (m, 6H), 1.68–1.76 (m, 2H), 3.02 (t,  $J$  = 7.8 Hz, 2H), 7.27 (d,  $J$  = 6.8 Hz, 1H), 7.35 (t,  $J$  = 7.5 Hz, 1H), 7.39–7.48 (m, 2H), 7.66 (d,  $J$  = 8.1 Hz, 1H), 7.80 (d,  $J$  = 7.7 Hz, 1H), 8.01 (d,  $J$  = 8.2 Hz, 1H).  $^{13}\text{C}$  NMR (100 MHz,  $\text{CDCl}_3$ )  $\delta$  = 14.3, 22.9, 29.7, 31.0, 32.0, 33.3, 124.1, 125.5, 125.68, 125.75, 126.0, 126.5, 128.9, 132.1, 134.1, 139.2.

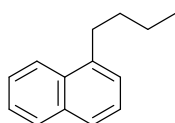

**1-butylnaphthalene (3aa).**<sup>3</sup>  $^1\text{H}$  NMR (400 MHz,  $\text{CDCl}_3$ )  $\delta$  = 0.95 (t,  $J$  = 7.3 Hz, 3H), 1.39–1.48 (m, 2H), 1.68–1.75 (m, 2H), 3.04 (t,  $J$  = 7.8 Hz, 2H), 7.28 (d,  $J$  = 6.9 Hz, 1H), 7.36 (t,  $J$  = 7.6 Hz, 1H), 7.41–7.49 (m, 2H), 7.67 (d,  $J$  = 8.1 Hz, 1H), 7.81 (d,  $J$  = 8.1 Hz, 1H), 8.02 (d,  $J$  = 8.2 Hz, 1H).  $^{13}\text{C}$  NMR (100 MHz,  $\text{CDCl}_3$ )  $\delta$  = 13.6, 22.5, 32.4, 32.6, 123.5, 125.0, 125.1, 125.2, 125.5, 126.0, 128.4, 131.6, 133.5, 138.4.

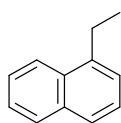

**1-ethylnaphthalene (3ad).**<sup>4</sup>  $^1\text{H}$  NMR (400 MHz,  $\text{CDCl}_3$ )  $\delta$  = 1.37 (t,  $J$  = 7.5 Hz, 3H), 3.07–3.13 (m, 2H), 7.32 (d,  $J$  = 7.0 Hz, 1H), 7.37–7.41 (m, 1H), 7.43–7.51 (m, 2H), 7.69 (d,  $J$  = 8.1 Hz, 1H), 7.82–7.85 (m, 1H), 8.03–8.05 (m, 1H).  $^{13}\text{C}$  NMR (100 MHz,  $\text{CDCl}_3$ )  $\delta$  = 14.6, 25.4, 123.3, 124.4, 124.9, 125.2, 125.9, 127.4, 128.3, 131.3, 133.3, 139.8.

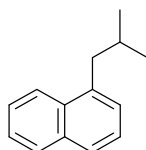

**1-isobutylnaphthalene (3af).**<sup>5</sup>  $^1\text{H}$  NMR (400 MHz,  $\text{CDCl}_3$ )  $\delta$  = 0.95 (d,  $J$  = 6.6 Hz, 6H), 2.00–2.10 (m, 1H), 2.90 (d,  $J$  = 7.2 Hz, 2H), 7.24 (d,  $J$  = 6.9 Hz, 1H), 7.33–7.37 (m, 1H), 7.40–7.47 (m, 2H), 7.67

(d,  $J = 8.2$  Hz, 1H), 7.81 (d,  $J = 7.5$  Hz, 1H), 8.00 (d,  $J = 8.1$  Hz, 1H).  $^{13}\text{C}$  NMR (100 MHz,  $\text{CDCl}_3$ )  $\delta = 22.5, 29.2, 42.3, 123.9, 124.99, 125.01, 125.2, 126.2, 126.7, 128.4, 131.9, 133.7, 137.5$ .

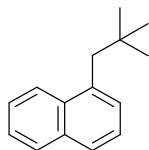

**1-neopentyl naphthalene (3ag).**<sup>6</sup>  $^1\text{H}$  NMR (400 MHz,  $\text{CDCl}_3$ )  $\delta = 0.96$  (s, 9H), 3.00 (s, 2H), 7.27 (d,  $J = 7.1$  Hz, 1H), 7.37 (d,  $J = 8.1$  Hz, 1H), 7.38–7.46 (m, 2H), 7.69 (d,  $J = 8.2$  Hz, 1H), 7.79–7.81 (m, 1H), 8.10 (d,  $J = 8.1$  Hz, 1H).  $^{13}\text{C}$  NMR (100 MHz,  $\text{CDCl}_3$ )  $\delta = 22.5, 29.2, 42.3, 123.9, 124.99, 125.01, 125.2, 126.2, 126.7, 128.4, 131.9, 133.7, 137.5$ .

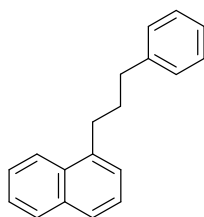

**1-(3-phenylpropyl) naphthalene (3ah).**<sup>7</sup>  $^1\text{H}$  NMR (400 MHz,  $\text{CDCl}_3$ )  $\delta = 2.04$ – $2.11$  (m, 2H), 2.73 (t,  $J = 7.7$  Hz, 2H), 3.08 (t,  $J = 7.7$  Hz, 2H), 7.17–7.20 (m, 3H), 7.25–7.30 (m, 3H), 7.35–7.38 (m, 1H), 7.41–7.48 (m, 2H), 7.68 (d,  $J = 8.1$  Hz, 1H), 7.80–7.84 (m, 1H), 7.93–7.95 (m, 1H).  $^{13}\text{C}$  NMR (100 MHz,  $\text{CDCl}_3$ )  $\delta = 31.8, 32.1, 35.5, 123.4, 125.0, 125.1, 125.3, 125.4, 125.5, 126.1, 127.9, 128.1, 128.3, 131.5, 133.5, 138.0, 141.8$ .

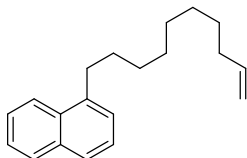

**1-(dec-9-en-1-yl) naphthalene (3ai).**  $^1\text{H}$  NMR (400 MHz,  $\text{CDCl}_3$ )  $\delta = 1.34$ – $1.53$  (m, 8H), 1.70–1.75 (m, 2H), 1.81–1.88 (m, 2H), 2.07–2.14 (m, 2H), 3.16 (t,  $J = 7.6$  Hz, 2H), 5.46–5.57 (m, 2H), 7.41 (d,  $J = 6.8$  Hz, 1H), 7.47–7.50 (m, 1H), 7.54–7.61 (m, 2H), 7.79 (d,  $J = 8.1$  Hz, 1H), 7.94 (d,  $J = 7.7$  Hz, 1H), 8.14 (d,  $J = 8.1$  Hz, 1H).  $^{13}\text{C}$  NMR (100 MHz,  $\text{CDCl}_3$ )  $\delta = 17.5, 28.7, 29.0, 29.2, 29.4, 30.4, 32.2, 32.7, 123.5, 124.2, 124.9, 125.1, 125.2, 125.4, 125.9, 128.3, 131.2, 131.5, 133.5, 138.6$ . HRMS (CI) Calcd for  $\text{C}_{20}\text{H}_{27}$  ( $\text{M}+\text{H}$ )<sup>+</sup>: 267.2107, Found: 267.2115.

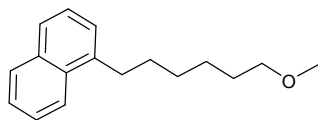

**1-(6-methoxyhexyl) naphthalene (3aj).**  $^1\text{H}$  NMR (400 MHz,  $\text{CDCl}_3$ )  $\delta = 1.29$ – $1.42$  (m, 4H), 1.48–1.54 (m, 2H), 1.65–1.72 (m, 2H), 2.99 (t,  $J = 7.8$  Hz, 2H), 3.25 (s, 3H), 3.29 (t,  $J = 6.6$  Hz, 2H), 7.23 (d,  $J = 6.7$  Hz, 1H), 7.29–7.33 (m, 1H), 7.36–7.44 (m, 2H), 7.62 (d,  $J = 8.1$  Hz, 1H), 7.75–7.78 (m, 1H), 7.96 (d,  $J = 8.2$  Hz, 1H).  $^{13}\text{C}$  NMR (100 MHz,  $\text{CDCl}_3$ )  $\delta = 25.6, 29.17, 29.19, 30.3, 32.6, 58.1, 72.4, 123.4, 124.9, 125.1, 125.2, 125.4, 125.9, 128.3, 131.4, 133.4, 138.4$ . HRMS (CI) Calcd for  $\text{C}_{17}\text{H}_{23}\text{O}$  ( $\text{M}+\text{H}$ )<sup>+</sup>: 243.1743, Found: 243.1750.

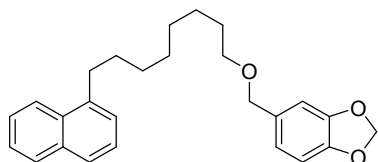

**5-(((8-(naphthalen-1-yl)octyl)oxy)methyl)benzo[d][1,3]dioxole (3ak).**  $^1\text{H}$  NMR (400 MHz,  $\text{CDCl}_3$ )  $\delta$  = 1.30–1.44 (m, 8H), 1.55–1.60 (m, 2H), 1.70–1.77 (m, 2H), 3.05 (t,  $J$  = 7.8 Hz, 2H), 3.41 (t,  $J$  = 6.7 Hz, 2H), 4.38 (s, 2H), 5.91 (s, 2H), 6.74–6.78 (m, 2H), 6.84 (s, 1H), 7.30 (d,  $J$  = 7.0 Hz, 1H), 7.38 (t,  $J$  = 7.1 Hz, 1H), 7.44–7.51 (m, 2H), 7.69 (d,  $J$  = 8.1 Hz, 1H), 7.81 (d,  $J$  = 8.0 Hz, 1H), 8.03 (d,  $J$  = 8.0 Hz, 1H).  $^{13}\text{C}$  NMR (100 MHz,  $\text{CDCl}_3$ )  $\delta$  = 25.75, 29.00, 29.30, 29.32, 30.38, 32.65, 69.8, 72.3, 100.5, 107.6, 107.9, 120.7, 123.4, 124.9, 125.1, 125.2, 125.4, 125.9, 128.3, 131.5, 132.2, 133.4, 138.5, 146.5, 147.3. HRMS (CI) Calcd for  $\text{C}_{26}\text{H}_{31}\text{O}_3(\text{M}+\text{H})^+$ : 391.2268, Found: 391.2284.

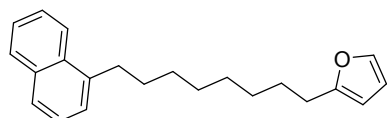

**2-(6-(naphthalen-4-yl)hexyl)furan (3al).**  $^1\text{H}$  NMR (400 MHz,  $\text{CDCl}_3$ )  $\delta$  = 1.31–1.49 (m, 8H), 1.65–1.70 (m, 2H), 1.76–1.84 (m, 2H), 2.66 (t,  $J$  = 7.5 Hz, 2H), 3.12 (t,  $J$  = 7.9 Hz, 2H), 6.02–6.03 (m, 1H), 6.32–6.33 (m, 1H), 7.35–7.36 (m, 1H), 7.38 (s, 1H), 7.43–7.47 (m, 1H), 7.50–7.58 (m, 2H), 7.76 (d,  $J$  = 8.2 Hz, 1H), 7.89–7.91 (m, 1H), 8.10 (d,  $J$  = 8.2 Hz, 1H).  $^{13}\text{C}$  NMR (100 MHz,  $\text{CDCl}_3$ )  $\delta$  = 27.48, 27.54, 28.7, 28.9, 28.9, 29.3, 30.4, 32.6, 104.0, 109.5, 123.4, 124.9, 125.1, 125.1, 125.4, 125.9, 128.3, 131.4, 133.4, 138.5, 140.1, 156.1. HRMS (CI) Calcd for  $\text{C}_{26}\text{H}_{31}\text{O}_3(\text{M}+\text{H})^+$ : 307.2056, Found: 307.2050.

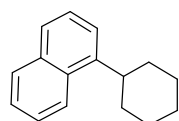

**1-cyclohexylnaphthalene (3am).**<sup>5</sup>  $^1\text{H}$  NMR (400 MHz,  $\text{CDCl}_3$ )  $\delta$  = 1.27–1.40 (m, 1H), 1.49–1.60 (m, 4H), 1.80–1.85 (m, 1H), 1.89–1.92 (m, 2H), 1.98–2.06 (m, 2H), 3.28–3.34 (m, 1H), 7.36–7.38 (m, 1H), 7.41 (d,  $J$  = 7.8 Hz, 1H), 7.43–7.45 (m, 1H), 7.48–7.50 (m, 1H), 7.67 (d,  $J$  = 8.0 Hz, 1H), 7.82–7.84 (m, 1H), 8.10 (d,  $J$  = 8.4 Hz, 1H).  $^{13}\text{C}$  NMR (100 MHz,  $\text{CDCl}_3$ )  $\delta$  = 26.6, 27.4, 34.3, 39.3, 122.3, 123.3, 125.3, 125.6, 125.7, 126.3, 129.0, 131.4, 134.0, 143.9.

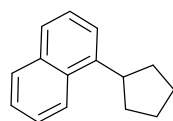

**1-cyclopentylnaphthalene (3an).**<sup>8</sup>  $^1\text{H}$  NMR (400 MHz,  $\text{CDCl}_3$ )  $\delta$  = 1.75–1.85 (m, 6H), 2.17–2.18 (m, 2H), 3.72–3.80 (m, 1H), 7.37–7.41 (m, 2H), 7.41–7.49 (m, 2H), 7.65–7.68 (m, 1H), 7.80–7.82 (m, 1H), 8.13 (d,  $J$  = 8.3 Hz, 1H).  $^{13}\text{C}$  NMR (100 MHz,  $\text{CDCl}_3$ )  $\delta$  = 25.1, 33.3, 40.9, 121.7, 123.7, 124.9, 125.2, 125.3, 126.0, 128.5, 132.0, 133.6, 141.8.

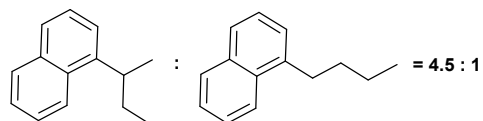

**1-sec-butyl naphthalene (3ao).**  $^1\text{H}$  NMR (400 MHz,  $\text{CDCl}_3$ )  $\delta$  = 0.92 (t,  $J$  = 7.4 Hz, 3H), 0.97 (t,  $J$  = 7.5 Hz, 0.67H), 1.37 (t,  $J$  = 6.9 Hz, 3H), 1.41–1.50 (m, 0.48H), 1.65–1.77 (m, 1.5H), 1.80–1.91 (m,



1H), 3.06 (t,  $J = 7.8$  Hz, 0.45H), 3.06 (t,  $J = 7.8$  Hz, 0.45H), 3.47–3.55 (m, 1H), 7.31 (d,  $J = 7.8$  Hz, 0.24H), 7.36–7.40 (m, 1H), 7.42–7.52 (m, 3.45H), 7.69 (d,  $J = 8.1$  Hz, 3.45H), 7.84–7.86 (m, 1H), 8.04 (d,  $J = 8.2$  Hz, 0.22H), 8.12 (d,  $J = 8.3$  Hz, 1H).

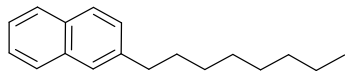

**2-octylnaphthalene (3bb).**<sup>4</sup> <sup>1</sup>H NMR (400 MHz, CDCl<sub>3</sub>)  $\delta = 0.87$  (t,  $J = 7.0$  Hz, 3H), 1.10–1.46 (m, 10H), 1.63–1.68 (m, 2H), 2.72 (t,  $J = 7.6$  Hz, 2H), 7.28 (d,  $J = 8.3$  Hz, 1H), 7.34–7.41 (m, 2H), 7.56 (s, 1H), 7.70–7.76 (m, 3H). <sup>13</sup>C NMR (100 MHz, CDCl<sub>3</sub>)  $\delta = 13.8, 22.4, 29.0, 29.1, 29.2, 31.1, 31.6, 35.8, 124.6, 125.4, 125.9, 127.06, 127.09, 127.3, 127.4, 131.6, 133.3, 140.1$ .

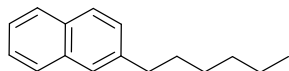

**2-hexylnaphthalene (3bc).**<sup>9</sup> <sup>1</sup>H NMR (400 MHz, CDCl<sub>3</sub>)  $\delta = 0.88$  (t,  $J = 7.0$  Hz, 3H), 1.25–1.38 (m, 6H), 1.65–1.72 (m, 2H), 2.75 (t,  $J = 7.8$  Hz, 2H), 7.30–7.33 (m, 1H), 7.37–7.44 (m, 2H), 7.59 (s, 1H), 7.73–7.79 (m, 3H). <sup>13</sup>C NMR (100 MHz, CDCl<sub>3</sub>)  $\delta = 14.2, 22.7, 29.1, 31.4, 31.8, 36.2, 125.0, 125.8, 126.3, 127.4, 127.5, 127.8, 132.0, 133.7, 140.5$ .

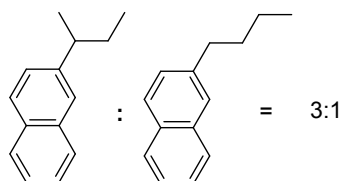

**2-sec-butyl naphthalene (3bo).** <sup>1</sup>H NMR (400 MHz, CDCl<sub>3</sub>)  $\delta = 0.85$  (t,  $J = 7.4$  Hz, 3H), 0.94 (t,  $J = 7.3$  Hz, 1H), 1.32 (d,  $J = 6.9$  Hz, 3H), 1.34–1.44 (m, 0.76H), 1.61–1.76 (m, 2.75H), 2.72–2.81 (m, 1.71H), 7.32–7.36 (m, 1.31H), 7.38–7.46 (m, 2.67H), 7.60 (s, 1H), 7.74–7.80 (m, 4H).

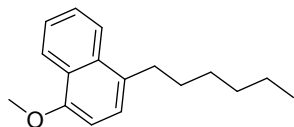

**1-hexyl-4-methoxynaphthalene (3cc).** <sup>1</sup>H NMR (400 MHz, CDCl<sub>3</sub>)  $\delta = 0.95$  (t,  $J = 7.1$  Hz, 3H), 1.37–1.40 (m, 4H), 1.44–1.50 (m, 2H), 1.63 (s, 3H), 1.72–1.80 (m, 2H), 3.03 (t,  $J = 7.8$  Hz, 2H), 4.04 (s, 3H), 6.79 (d,  $J = 7.8$  Hz, 1H), 7.24 (d,  $J = 7.7$  Hz, 1H), 7.50–7.59 (m, 2H), 8.03 (d,  $J = 8.0$  Hz, 1H), 8.34–8.36 (m, 1H). <sup>13</sup>C NMR (100 MHz, CDCl<sub>3</sub>)  $\delta = 13.7, 22.2, 29.0, 30.4, 31.3, 32.2, 55.0, 102.9, 122.0, 123.3, 124.2, 124.9, 125.4, 125.6, 130.4, 132.2, 153.5$ . HRMS (CI) Calcd for C<sub>17</sub>H<sub>23</sub>O (M+H)<sup>+</sup>: 243.1743, Found: 243.1750.

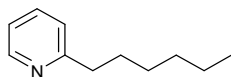

**2-hexylpyridine (3dc).**<sup>5</sup> <sup>1</sup>H NMR (400 MHz, CDCl<sub>3</sub>)  $\delta = 0.78$  (t,  $J = 7.0$  Hz, 3H), 1.19–1.28 (m, 6H), 1.59–1.67 (m, 2H), 2.68 (t,  $J = 7.6$  Hz, 2H), 6.95–6.98 (m, 1H), 7.02 (d,  $J = 7.8$  Hz, 1H), 7.43–7.47 (m, 1H), 8.41–8.42 (m, 1H). <sup>13</sup>C NMR (100 MHz, CDCl<sub>3</sub>)  $\delta = 13.5, 22.0, 28.5, 29.3, 31.2, 37.9, 120.2, 122.1, 135.6, 148.6, 161.9$ .

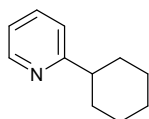

**2-cyclohexylpyridine (3dm).**<sup>10</sup> <sup>1</sup>H NMR (400 MHz, CDCl<sub>3</sub>) δ = 1.23–1.34 (m, 1H), 1.36–1.47 (m, 2H), 1.48–1.58 (m, 2H), 1.72–1.79 (m, 1H), 1.84–1.89 (m, 2H), 1.94–1.97 (m, 2H), 2.66–2.74 (m, 1H), 7.07–7.10 (m, 1H), 7.15 (d, *J* = 7.9 Hz, 1H), 7.57–7.62 (m, 1H), 8.52–8.54 (m, 1H). <sup>13</sup>C NMR (100 MHz, CDCl<sub>3</sub>) δ = 25.6, 26.1, 32.4, 46.1, 120.5, 135.9, 148.5, 166.0.

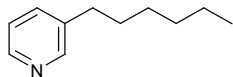

**3-hexylpyridine (3ec).**<sup>5</sup> <sup>1</sup>H NMR (400 MHz, CDCl<sub>3</sub>) δ = 0.88 (t, *J* = 6.9 Hz, 3H), 1.25–1.36 (m, 6H), 1.57–1.64 (m, 2H), 2.59 (t, *J* = 7.8 Hz, 2H), 7.17–7.20 (m, 1H), 7.48 (d, *J* = 7.8 Hz, 1H), 8.41–8.44 (m, 2H). <sup>13</sup>C NMR (100 MHz, CDCl<sub>3</sub>) δ = 13.5, 22.0, 28.3, 30.6, 31.1, 32.5, 122.7, 135.4, 137.5, 146.5, 149.3.

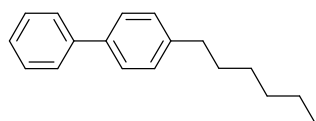

**4-hexyl-1,1'-Biphenyl (3fc).**<sup>7</sup> <sup>1</sup>H NMR (400 MHz, CDCl<sub>3</sub>) δ = 0.89 (t, *J* = 6.9 Hz, 3H), 1.29–1.38 (m, 6H), 1.60–1.68 (m, 2H), 2.63 (t, *J* = 7.9 Hz, 2H), 7.24 (d, *J* = 8.1 Hz, 2H), 7.28–7.32 (m, 1H), 7.41 (t, *J* = 7.6 Hz, 2H), 7.49–7.51 (m, 2H), 7.56–7.59 (m, 2H). <sup>13</sup>C NMR (100 MHz, CDCl<sub>3</sub>) δ = 13.7, 22.2, 28.6, 31.1, 31.3, 35.2, 126.51, 126.55, 128.3, 128.4, 138.1, 140.8, 141.7.

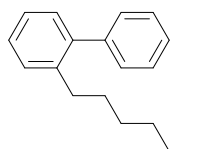

**2-hexyl-1,1'-biphenyl (3gc).**<sup>7</sup> <sup>1</sup>H NMR (400 MHz, CDCl<sub>3</sub>) δ = 0.84 (t, *J* = 6.9 Hz, 3H), 1.16–1.28 (m, 6H), 1.44–1.51 (m, 2H), 2.58 (t, *J* = 7.9 Hz, 2H), 7.21–7.26 (m, 2H), 7.27–7.30 (m, 1H), 7.30–7.32 (m, 2H), 7.33–7.35 (m, 1H), 7.35–7.38 (m, 1H), 7.41–7.45 (m, 2H). <sup>13</sup>C NMR (100 MHz, CDCl<sub>3</sub>) δ = 13.5, 22.0, 26.1, 30.6, 32.2, 44.7, 115.3, 120.4, 127.4, 127.6, 128.6, 128.7, 128.8, 129.8, 136.6, 151.9.

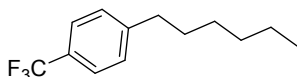

**1-hexyl-4-(trifluoromethyl)benzene (3hc).**<sup>12</sup> <sup>1</sup>H NMR (400 MHz, CDCl<sub>3</sub>) δ = 0.94 (t, *J* = 6.9 Hz, 3H), 1.32–1.43 (m, 6H), 1.64–1.71 (m, 2H), 2.71 (t, *J* = 7.8 Hz, 2H), 7.34 (d, *J* = 7.9 Hz, 2H), 7.58 (d, *J* = 7.9 Hz, 2H). <sup>13</sup>C NMR (100 MHz, CDCl<sub>3</sub>) δ = 13.58, 13.64, 22.1, 22.22, 28.4, 28.9, 29.19, 29.23, 30.7, 31.2, 31.5, 35.3, 124.6, 124.6, 124.67, 124.71, 128.2.

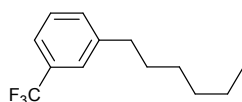

**1-hexyl-3-(trifluoromethyl)benzene (3ic).** <sup>1</sup>H NMR (400 MHz, CDCl<sub>3</sub>) δ = 0.88 (t, *J* = 7.0 Hz, 3H), 1.26–1.35 (m, 6H), 1.58–1.66 (m, 2H), 2.65 (t, *J* = 7.9 Hz, 2H), 7.33–7.39 (m, 2H), 7.42–7.44 (m, 2H). <sup>13</sup>C NMR (100 MHz, CDCl<sub>3</sub>) δ = 13.6, 22.1, 28.4, 30.8, 31.2, 35.3, 121.97, 122.01, 124.55, 124.59, 128.1, 131.30, 131.31, 143.3. HRMS (CI) Calcd for C<sub>13</sub>H<sub>18</sub>F<sub>3</sub>(M+H)<sup>+</sup>: 231.1355, Found: 231.1355.

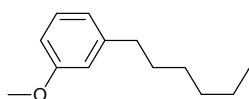

**1-hexyl-3-methoxybenzene (3jc).**<sup>11</sup> <sup>1</sup>H NMR (400 MHz, CDCl<sub>3</sub>) δ = 0.88 (t, *J* = 6.6 Hz, 3H), 1.30–

1.36 (m, 6H), 1.56–1.64 (m, 2H), 2.57 (t,  $J = 7.9$  Hz, 2H), 3.77 (s, 3H), 6.70–6.72 (m, 2H), 6.76 (d,  $J = 7.6$  Hz, 1H), 7.15–7.20 (m, 1H).  $^{13}\text{C}$  NMR (100 MHz,  $\text{CDCl}_3$ )  $\delta = 13.7, 22.2, 28.6, 30.9, 31.3, 35.6, 54.6, 110.3, 113.7, 120.4, 128.7, 144.2, 159.1$ .

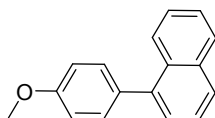

**1-(4-methoxyphenyl)naphthalene (3aq).**  $^{13}\text{H}$  NMR (400 MHz,  $\text{CDCl}_3$ )  $\delta = 3.96$  (s, 3H), 7.10–7.12 (m, 2H), 7.47–7.52 (m, 4H), 7.54–7.60 (m, 2H), 7.91 (d,  $J = 8.2$  Hz, 1H), 7.96–8.01 (m, 2H).  $^{13}\text{C}$  NMR (100 MHz,  $\text{CDCl}_3$ )  $\delta = 54.9, 113.3, 124.9, 125.2, 125.5, 125.6, 126.5, 126.9, 127.8, 130.7, 131.37, 132.7, 133.4, 139.5$ .

## Copies of NMR Spectra for All Compounds

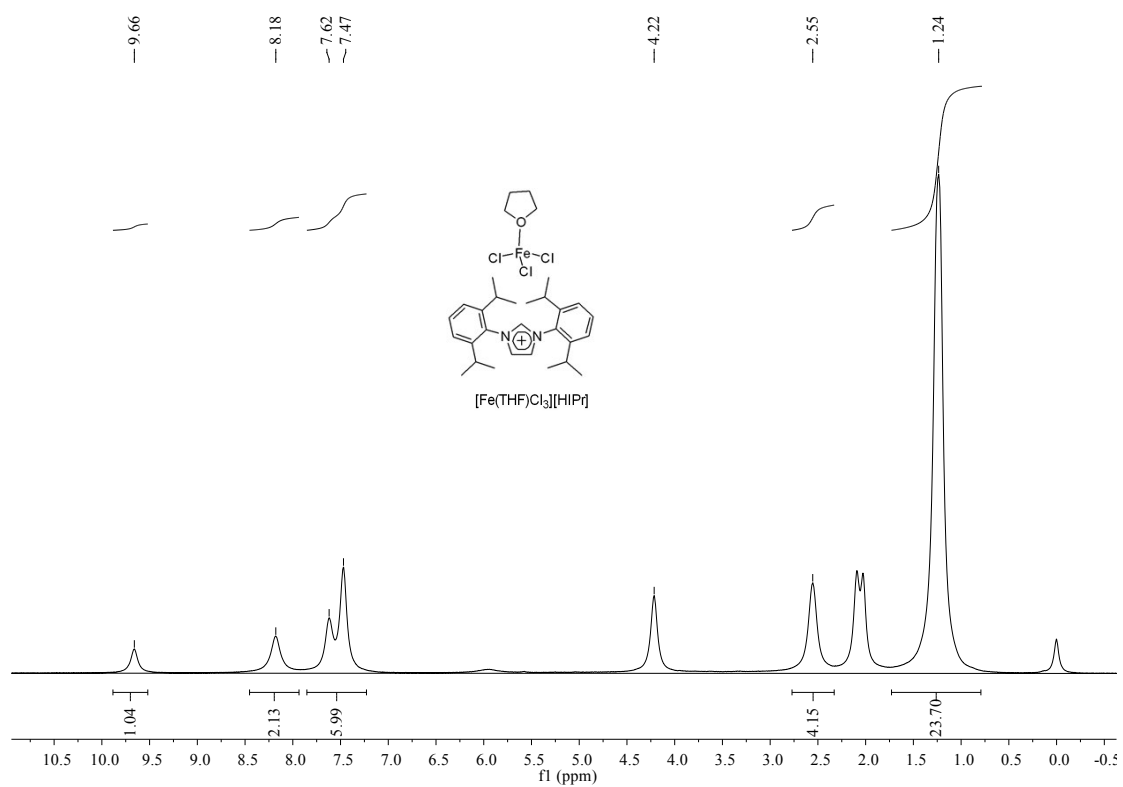

**Figure S1.** <sup>1</sup>H NMR spectrum of [HIPr][Fe(C<sub>4</sub>H<sub>8</sub>O)Cl<sub>3</sub>] (1) in (CD<sub>3</sub>)<sub>2</sub>CO.

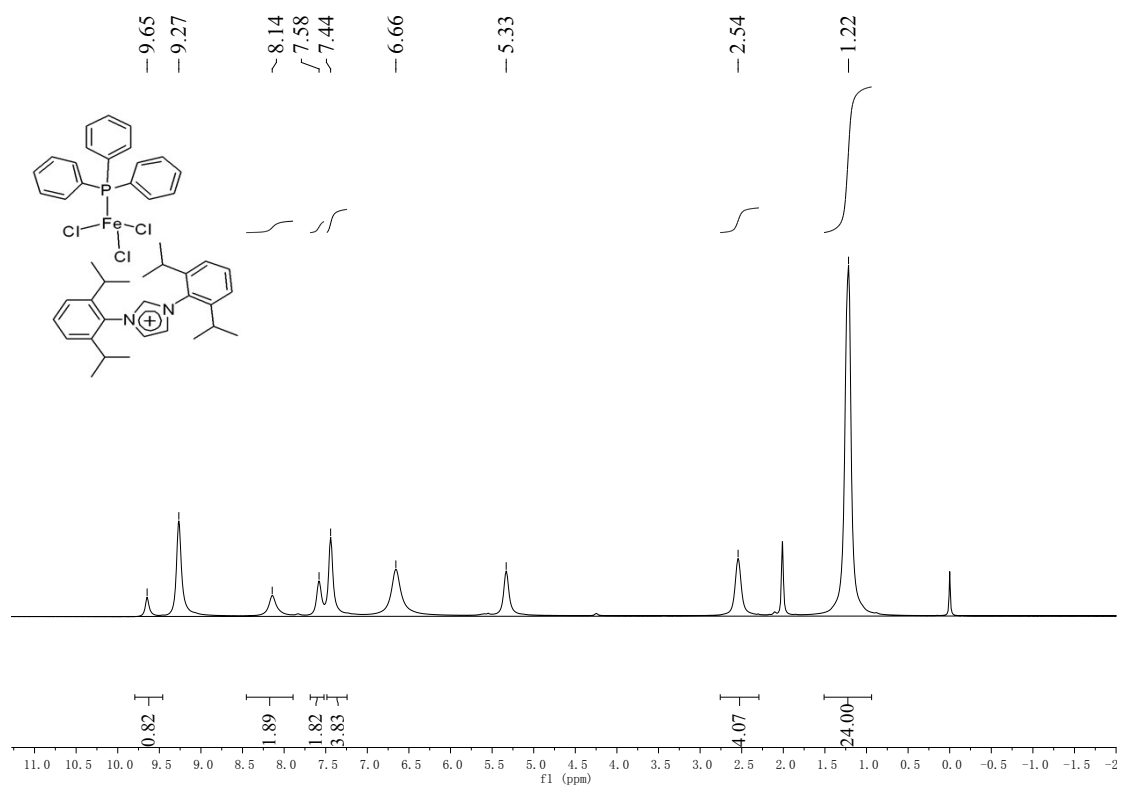

**Figure S2.**  $^1\text{H}$  NMR spectrum of  $[\text{HIPr}][\text{Fe}(\text{PPh}_3)\text{Cl}_3]$  (2) in  $(\text{CD}_3)_2\text{CO}$ .

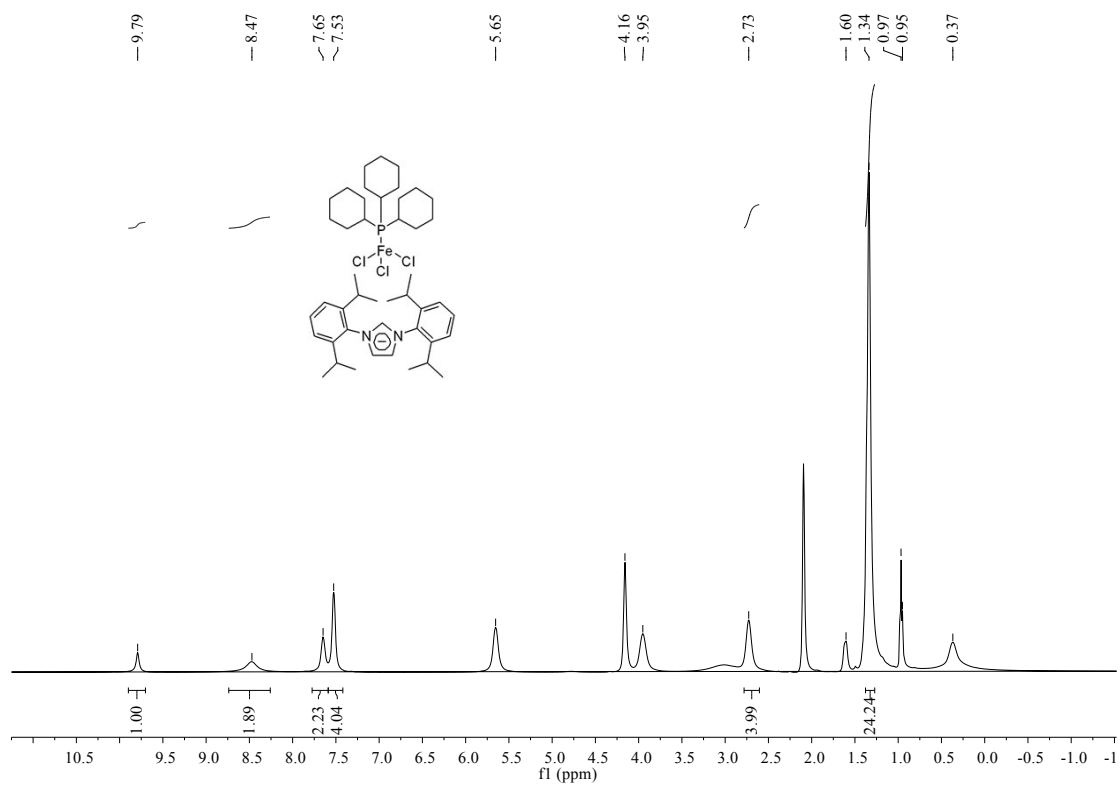

**Figure S3.**  $^1\text{H}$  NMR spectrum of  $[\text{HfPr}][\text{Fe}(\text{PCy}_3)\text{Cl}_3]$  (3) in  $(\text{CD}_3)_2\text{CO}$ .

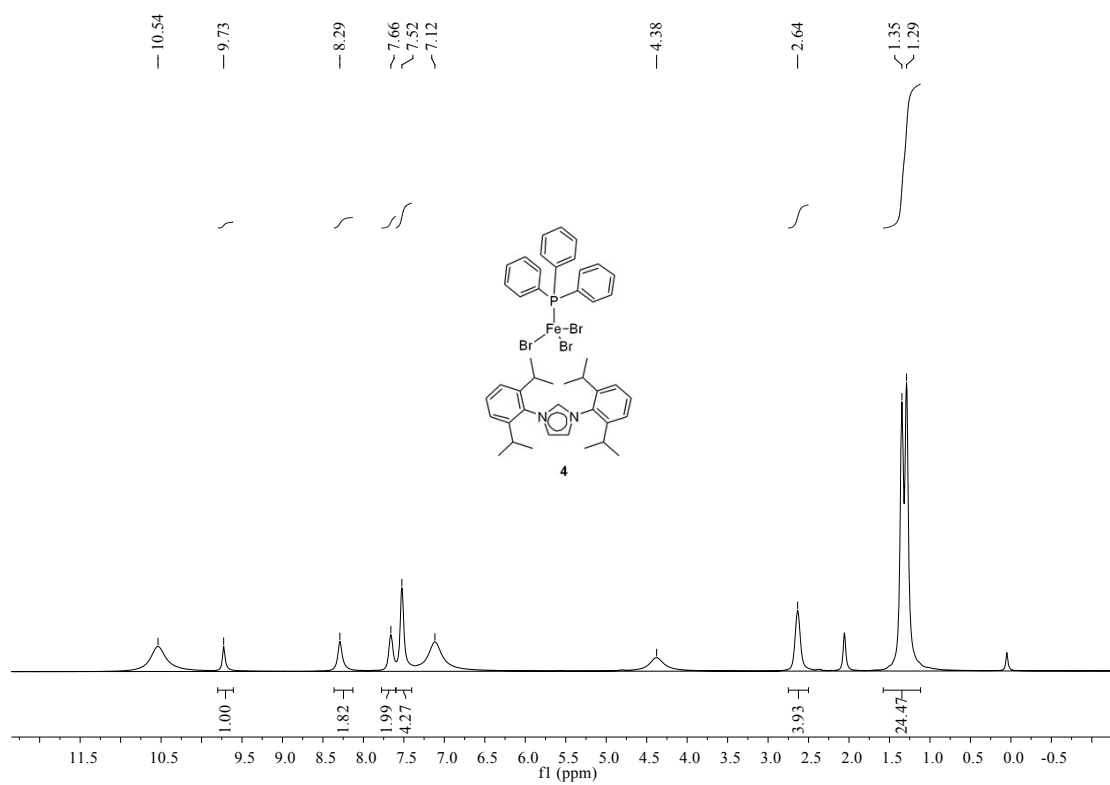

**Figure S4.**  $^1\text{H}$  NMR spectrum of  $[\text{HIPr}][\text{Fe}(\text{PPh}_3)\text{Br}_3]$  (4) in  $(\text{CD}_3)_2\text{CO}$ .

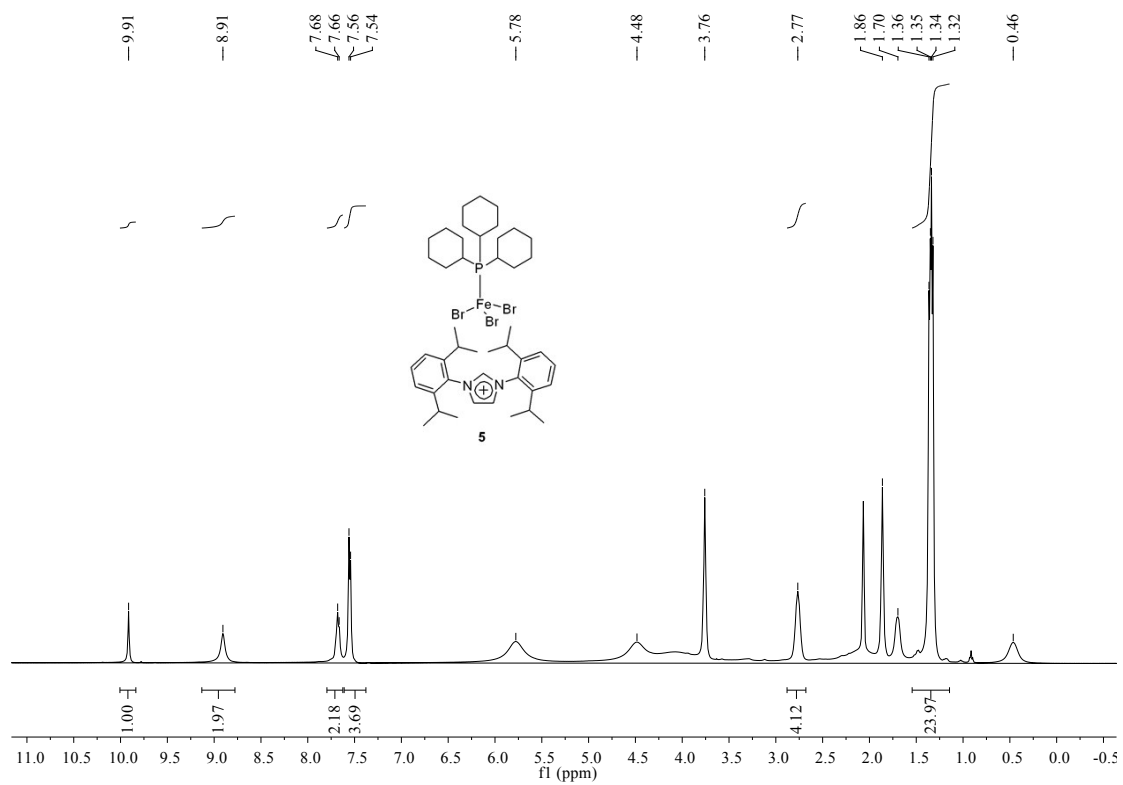

**Figure S5.** <sup>1</sup>H NMR spectrum of [HIPr][Fe(PCy<sub>3</sub>)Br<sub>3</sub>] (**5**) in (CD<sub>3</sub>)<sub>2</sub>CO.



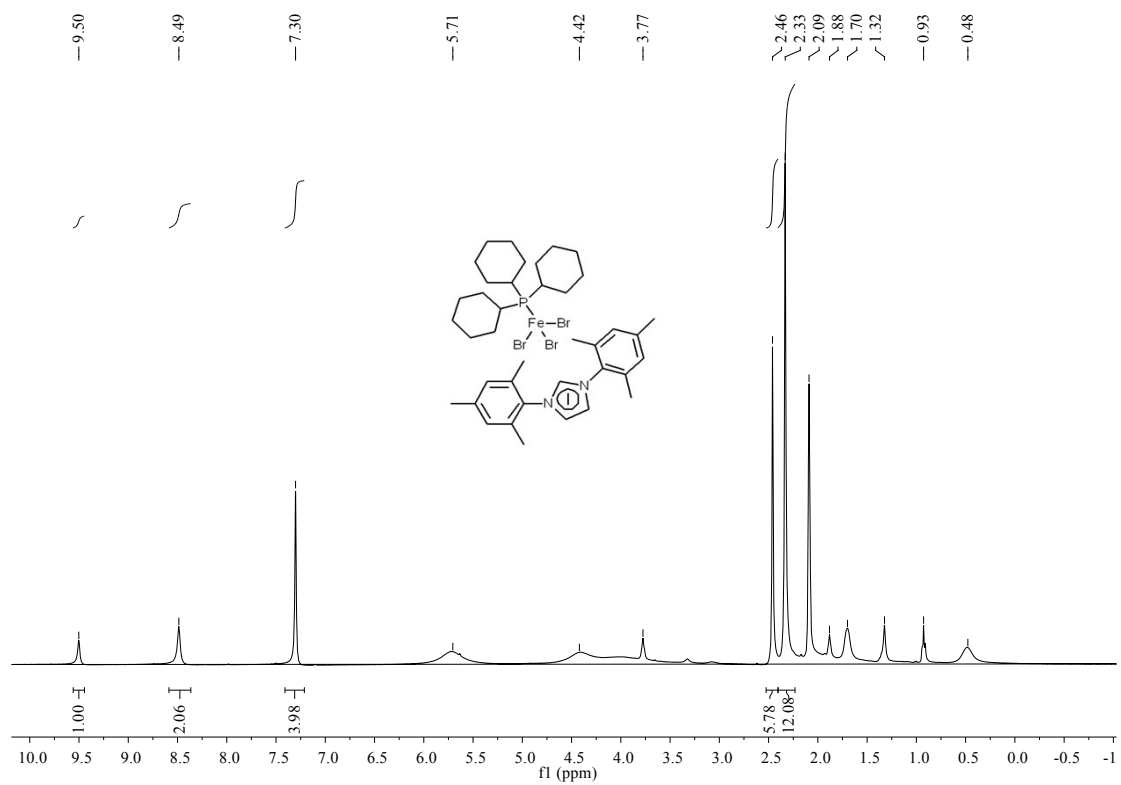

**Figure S6.**  $^1\text{H}$  NMR spectrum of  $[\text{HIMes}][\text{Fe}(\text{PCy}_3)\text{Br}_3]$  (6) in  $(\text{CD}_3)_2\text{CO}$ .

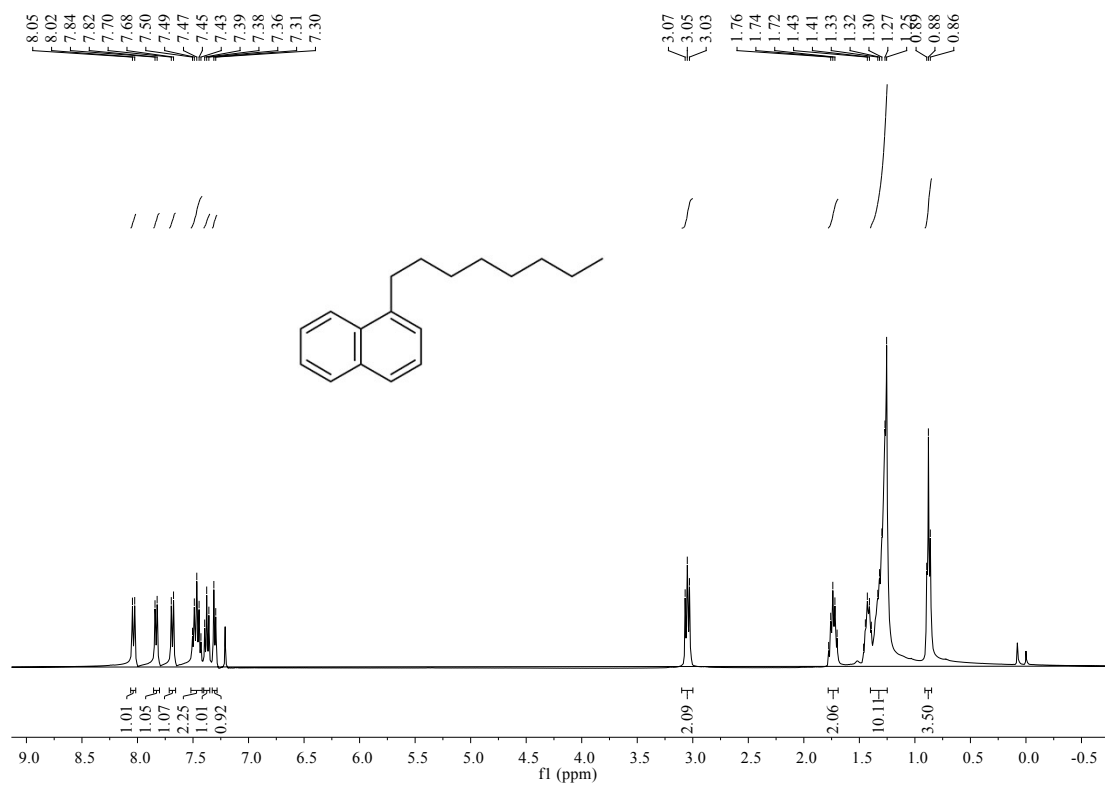

**Figure S7.** <sup>1</sup>H NMR spectrum of 1-octylnaphthalene (3ab) in CDCl<sub>3</sub>.

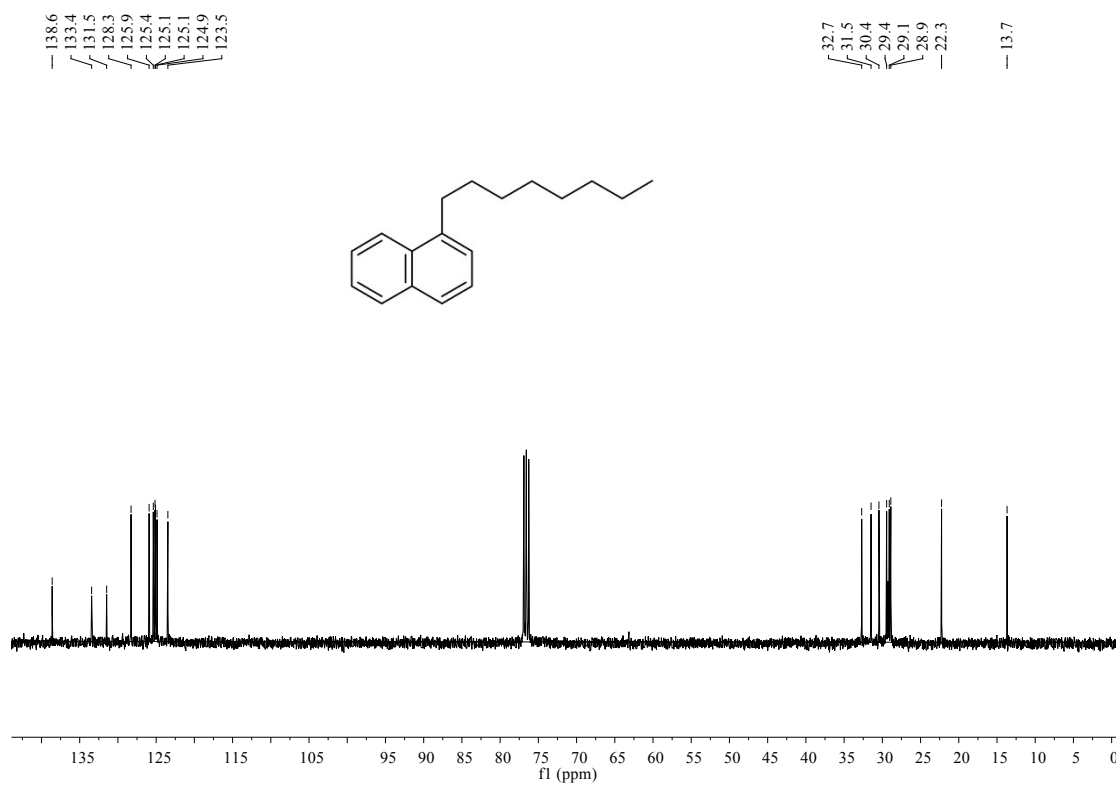

**Figure S8.** <sup>13</sup>C NMR spectrum of 1-octylnaphthalene (3ab) in CDCl<sub>3</sub>.

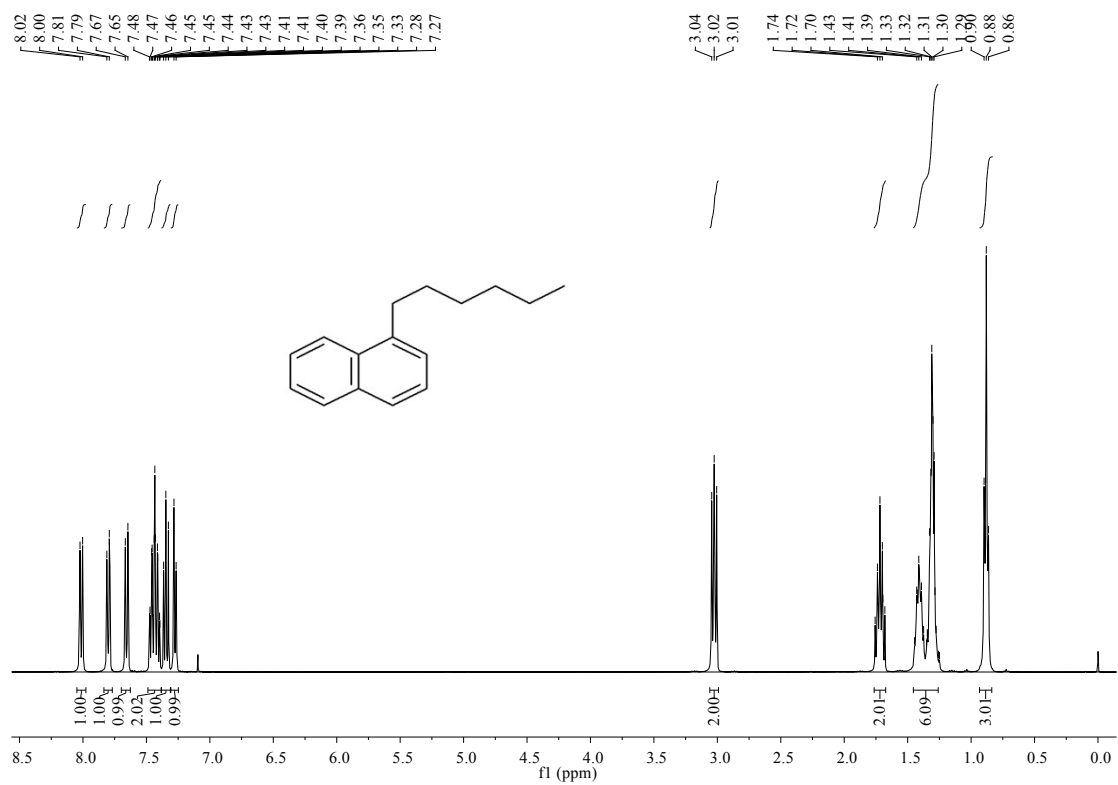

**Figure S9.**  $^1\text{H}$  NMR spectrum of 1-hexylnaphthalene (**3ac**) in  $\text{CDCl}_3$ .

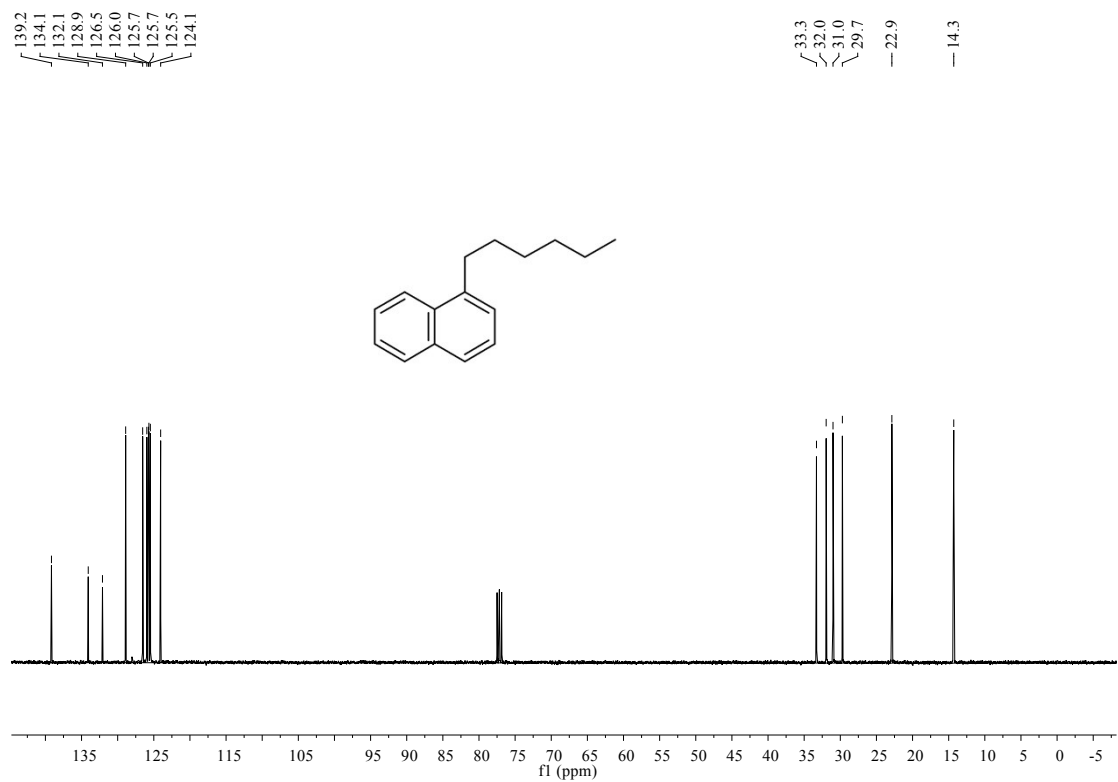

**Figure S10.**  $^{13}\text{C}$  NMR spectrum of 1-hexylnaphthalene (**3ac**) in  $\text{CDCl}_3$ .

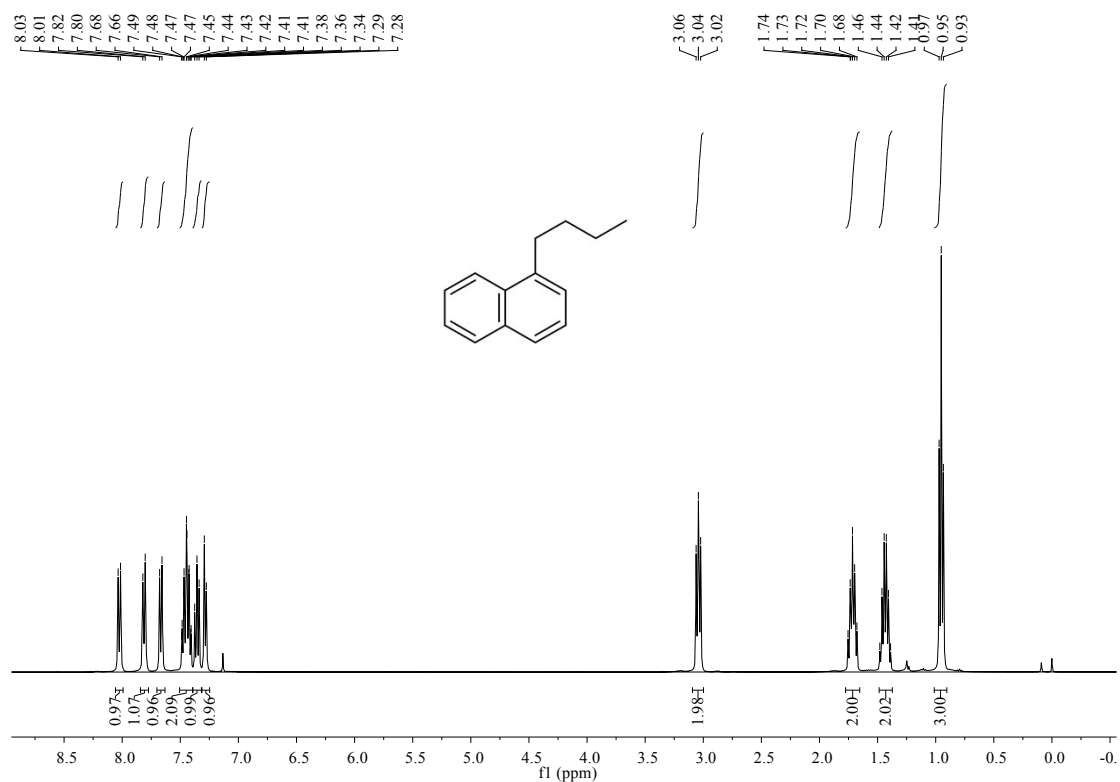

Figure S11. <sup>1</sup>H NMR spectrum of 1-butyl-naphthalene (3aa) in CDCl<sub>3</sub>.

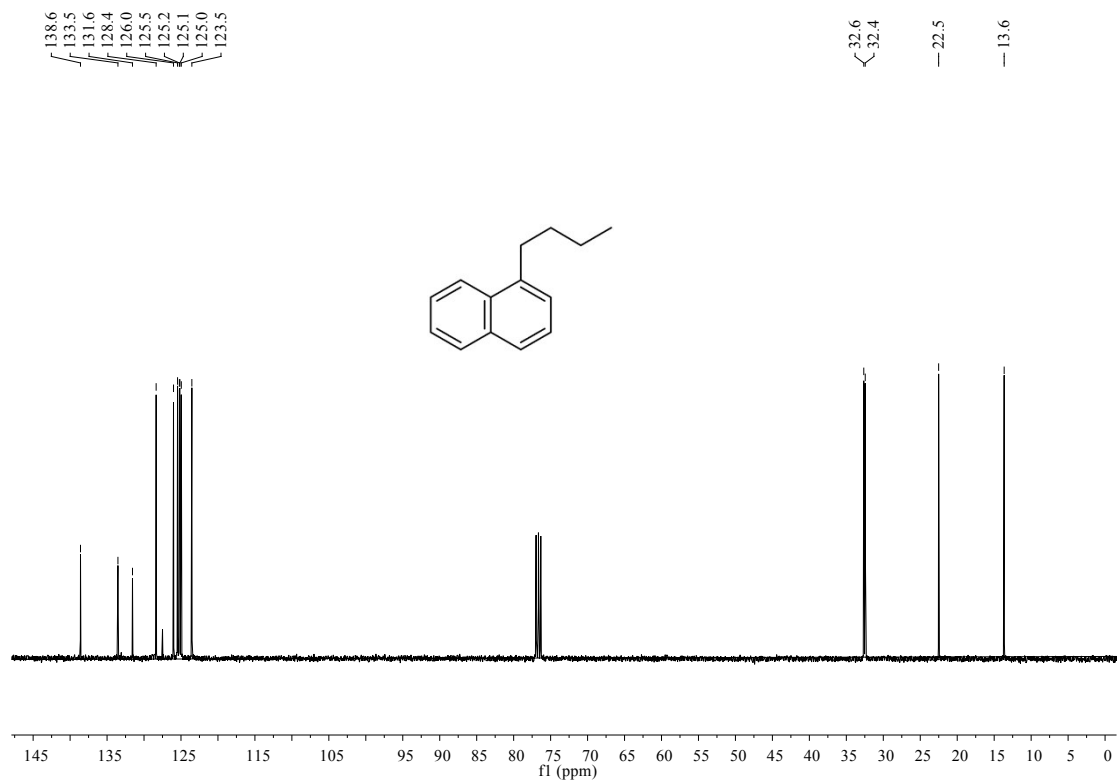

Figure S12. <sup>13</sup>C NMR spectrum of 1-butyl-naphthalene (3aa) in CDCl<sub>3</sub>.

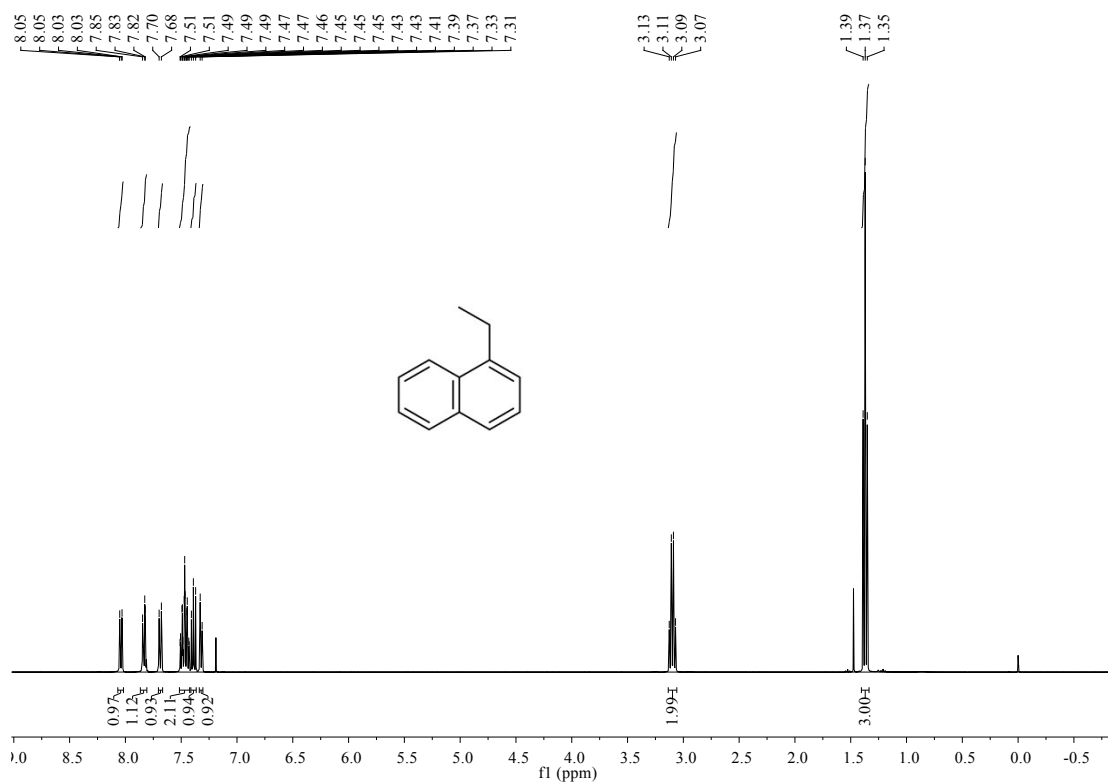

**Figure S13.**  $^1\text{H}$  NMR spectrum of 1-ethylnaphthalene (**3ad**) in  $\text{CDCl}_3$ .

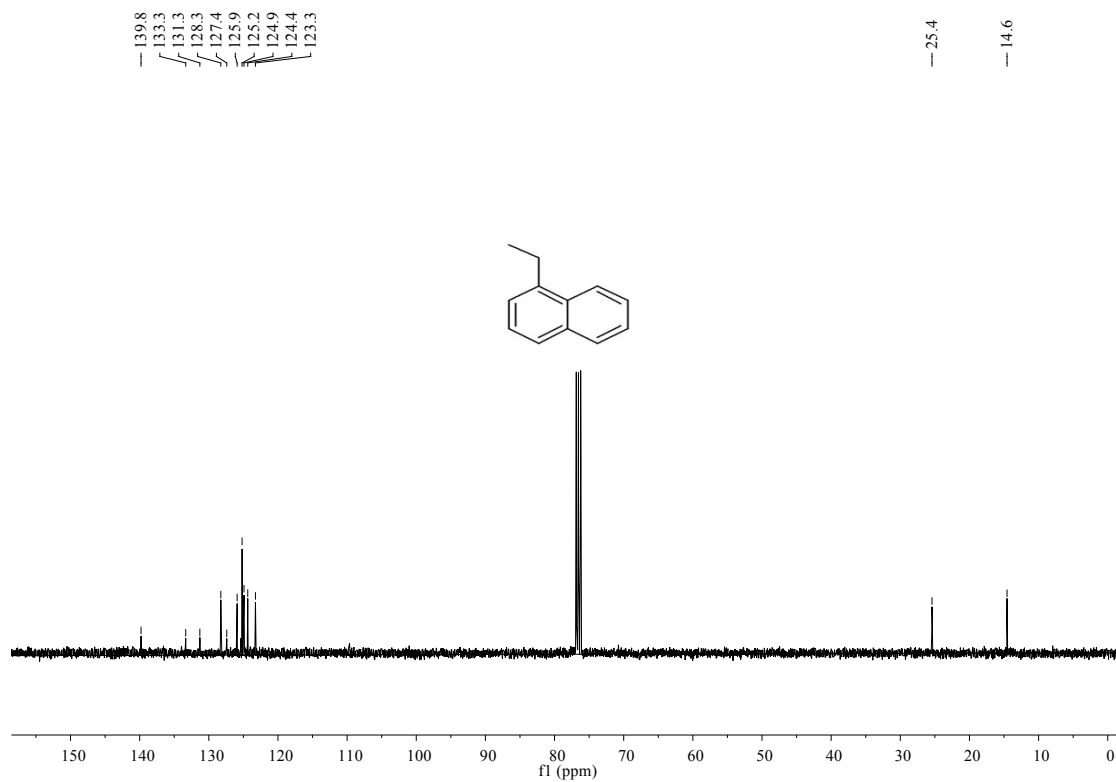

**Figure S14.**  $^{13}\text{C}$  NMR spectrum of 1-ethylnaphthalene (**3ad**) in  $\text{CDCl}_3$ .

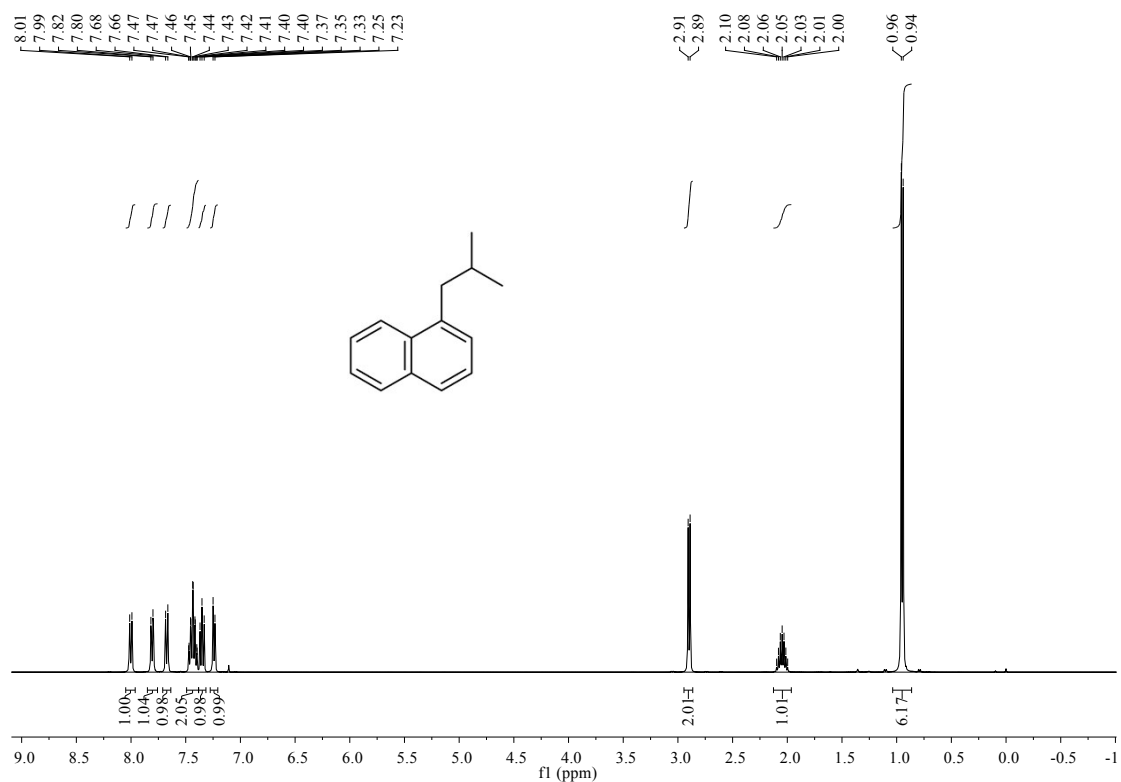

**Figure S15.**  $^1\text{H}$  NMR spectrum of **1-isobutylnaphthalene (3af)** in  $\text{CDCl}_3$ .

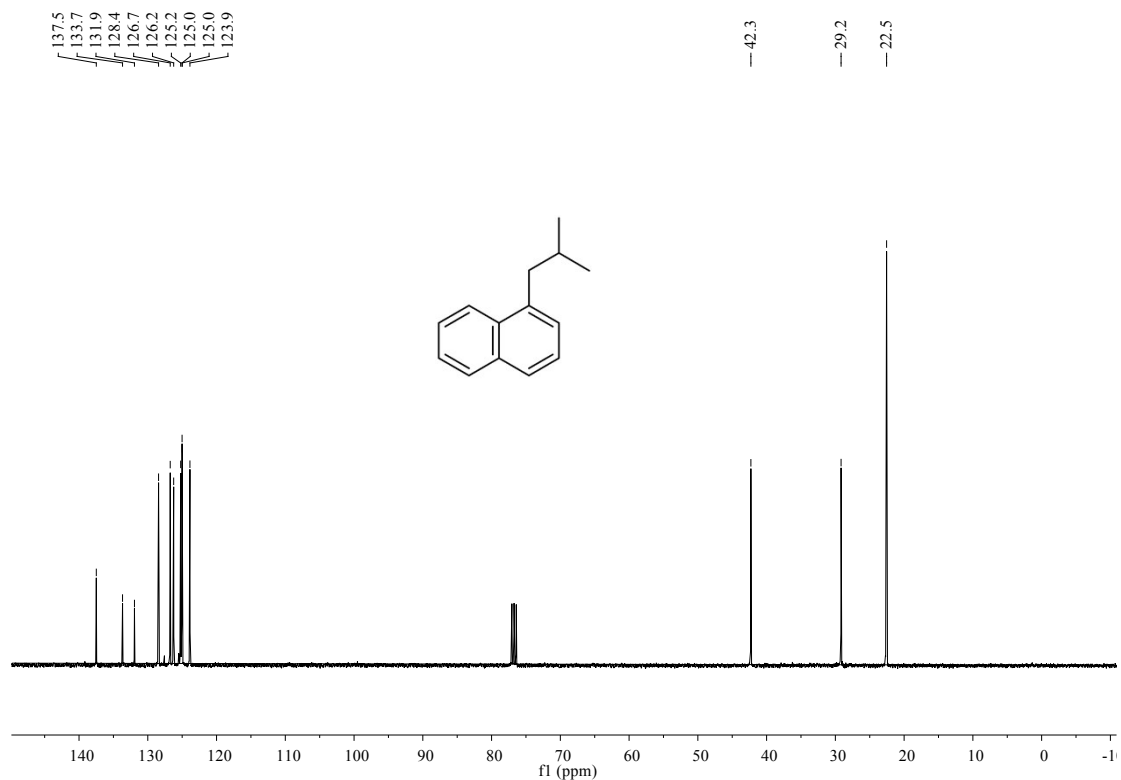

**Figure S16.**  $^{13}\text{C}$  NMR spectrum of **1-isobutylnaphthalene (3af)** in  $\text{CDCl}_3$ .

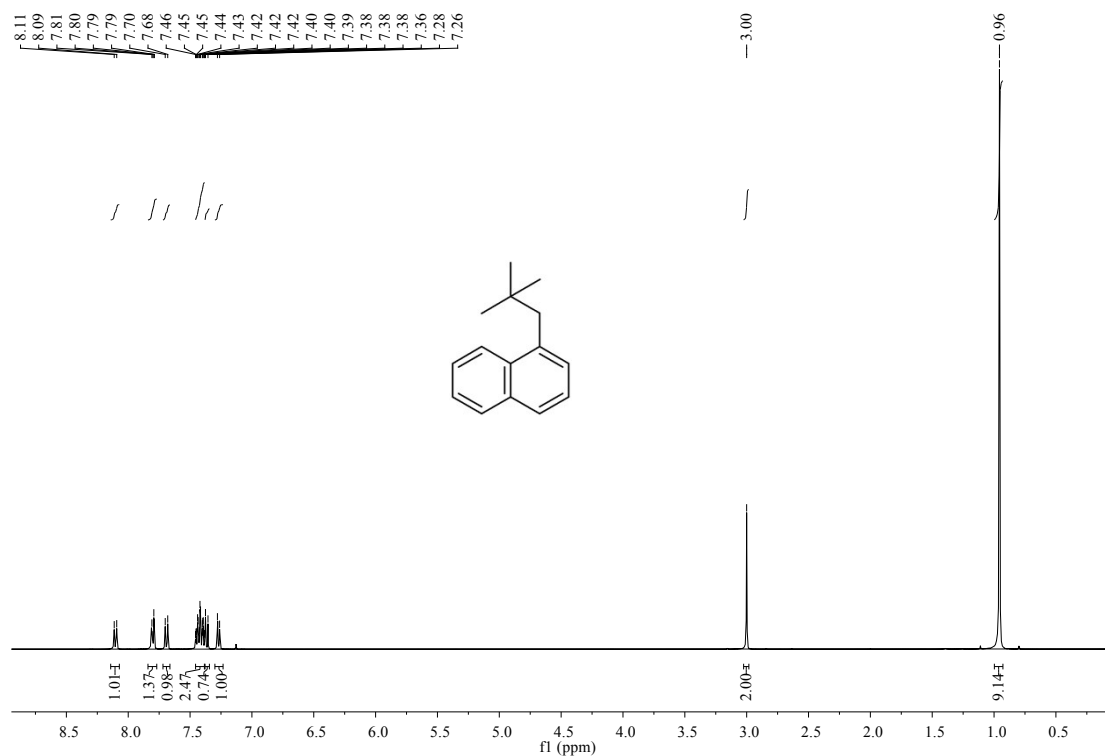

**Figure S17.** <sup>1</sup>H NMR spectrum of 1-neopentyl-naphthalene (**3ag**) in CDCl<sub>3</sub>.

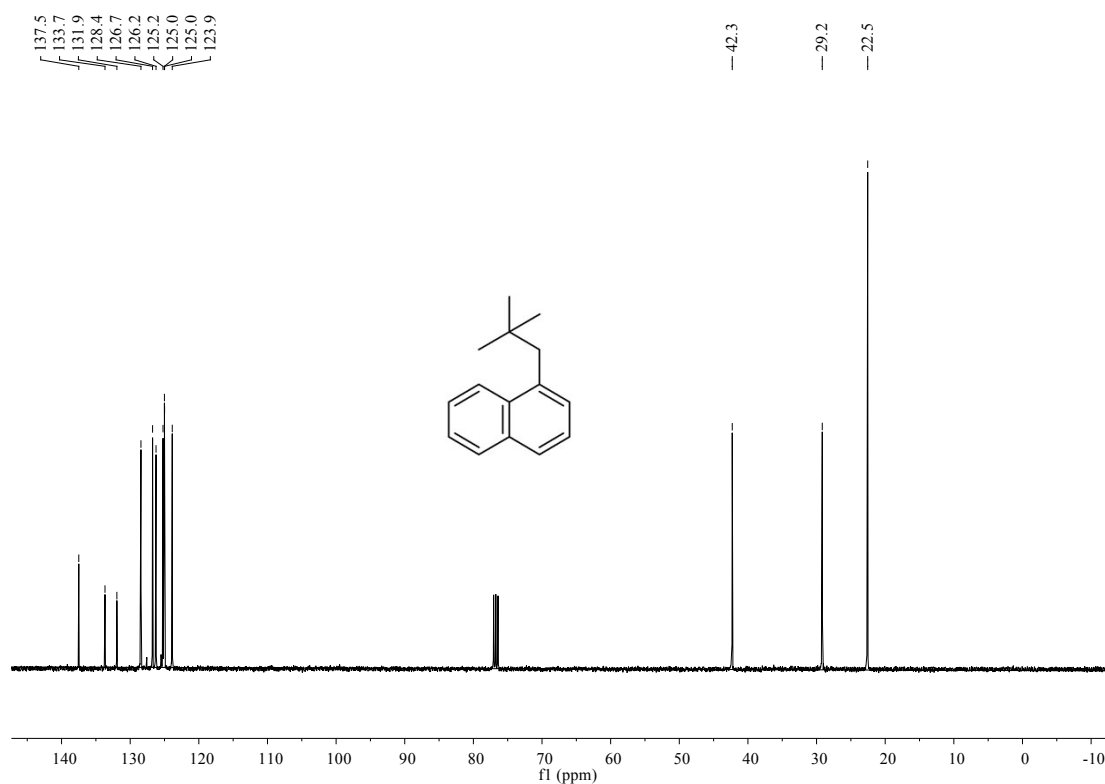

**Figure S18.** <sup>13</sup>C NMR spectrum of 1-neopentyl-naphthalene (**3ag**) in CDCl<sub>3</sub>.

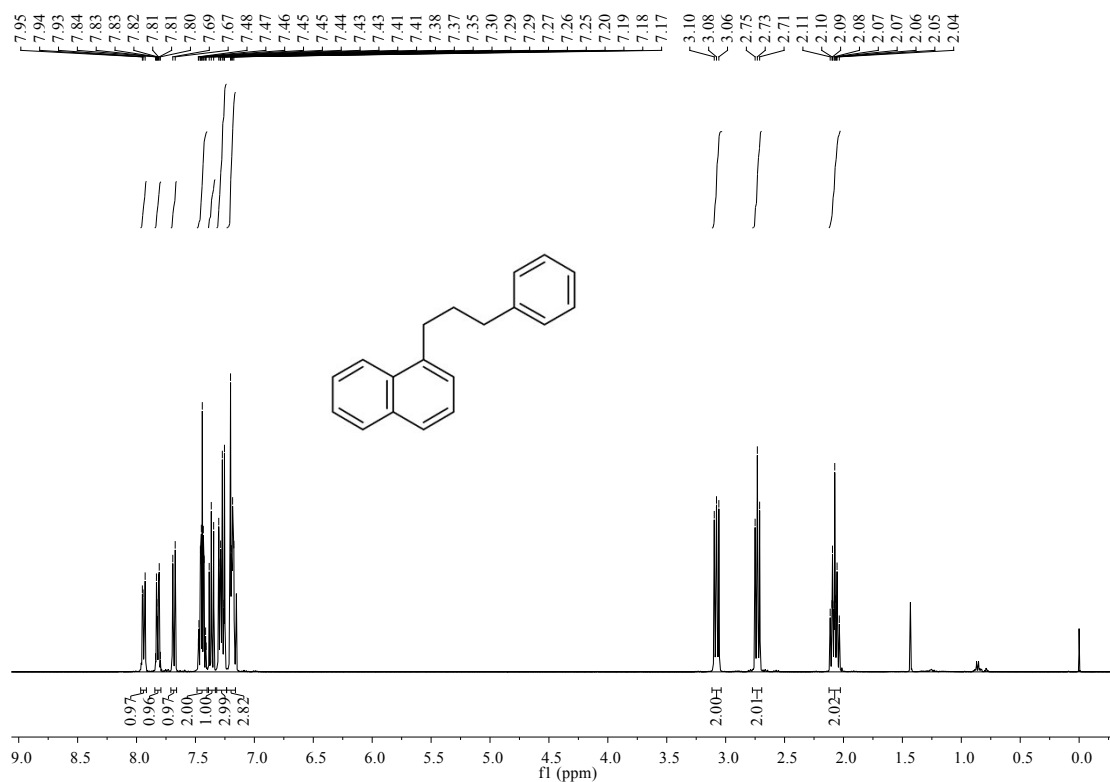

Figure S19. <sup>1</sup>H NMR spectrum of 1-neopentyl-naphthalene (3ah) in CDCl<sub>3</sub>.

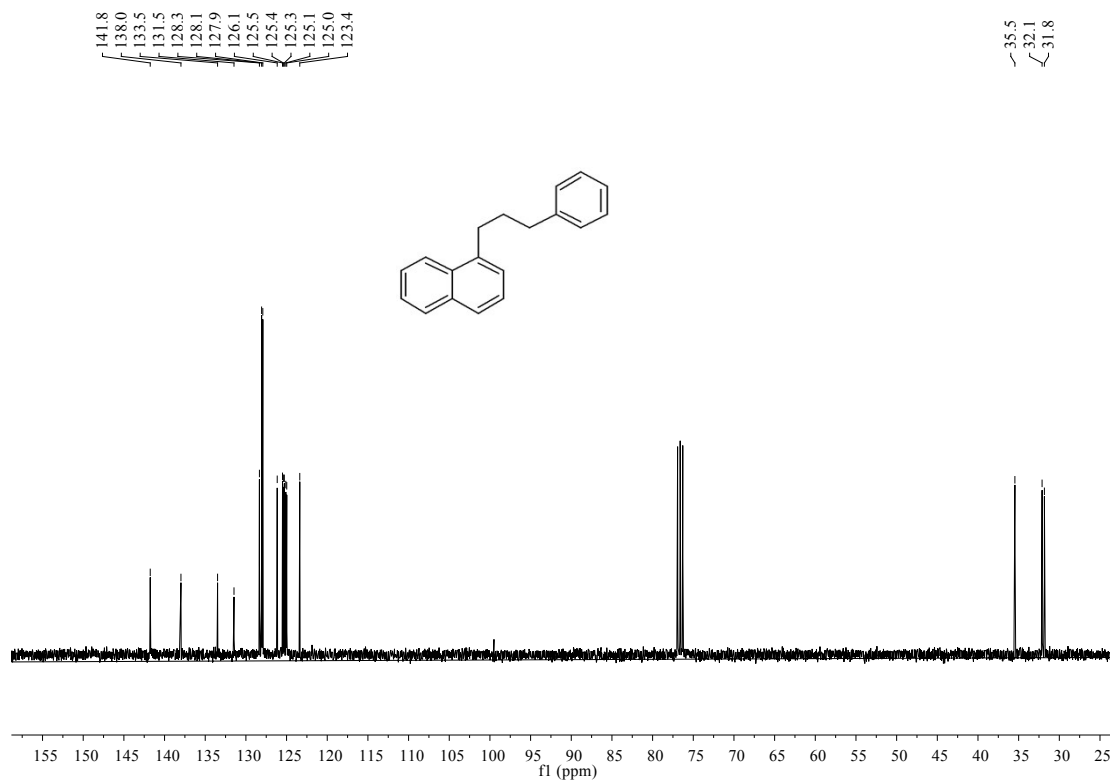

Figure S20. <sup>13</sup>C NMR spectrum of 1-neopentyl-naphthalene (3ah) in CDCl<sub>3</sub>.



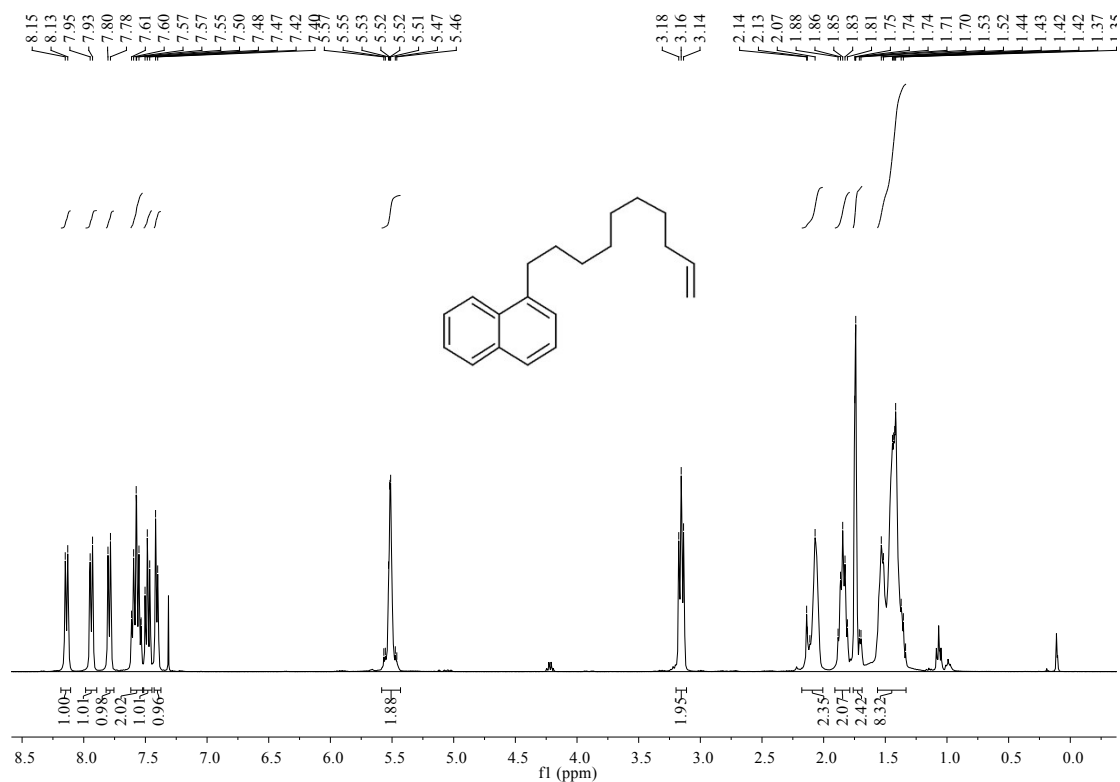

**Figure S21.** <sup>1</sup>H NMR spectrum of 1-(dec-9-en-1-yl)naphthalene (3ai) in CDCl<sub>3</sub>.

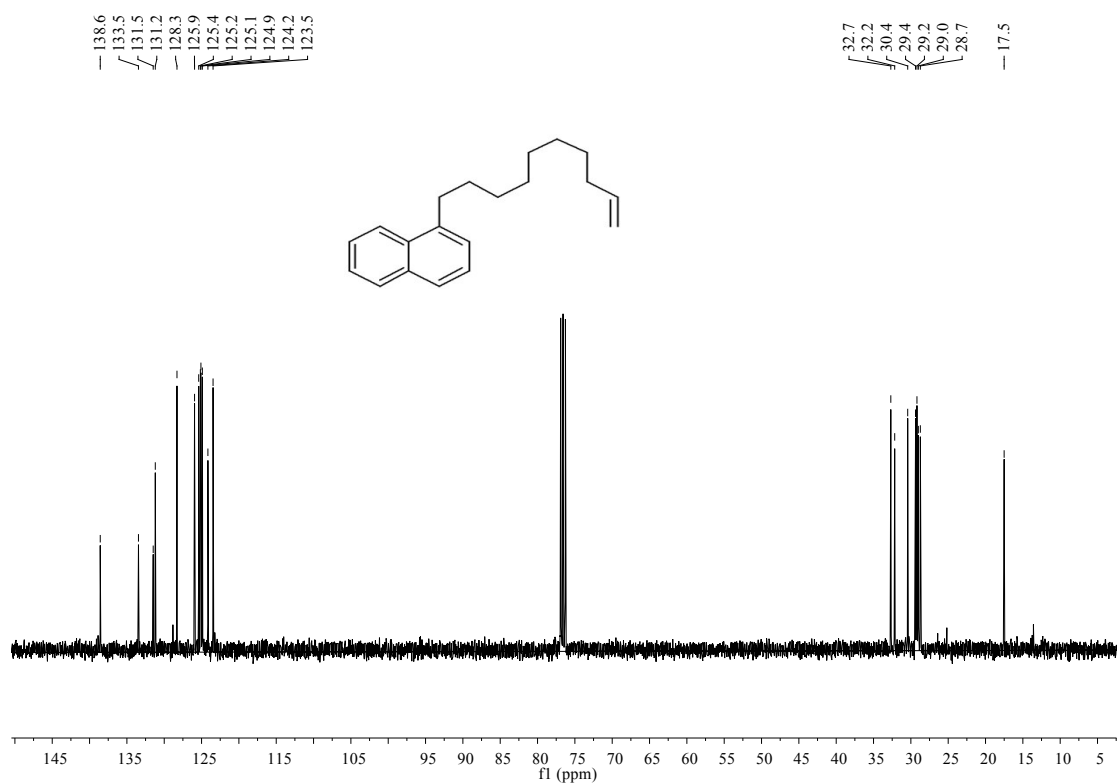

**Figure S22.** <sup>13</sup>C NMR spectrum of 1-(dec-9-en-1-yl)naphthalene (3ai) in CDCl<sub>3</sub>.

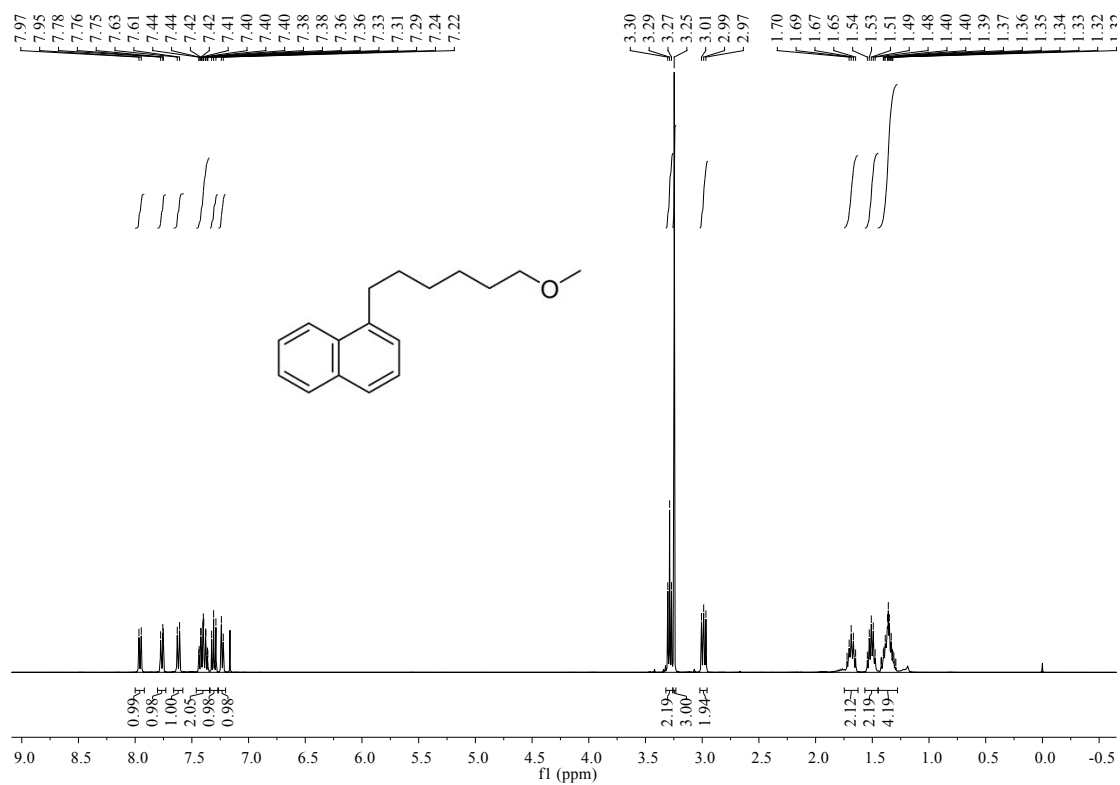

Figure S23. <sup>1</sup>H NMR spectrum of 1-(6-methoxyhexyl)naphthalene (3aj) in CDCl<sub>3</sub>.

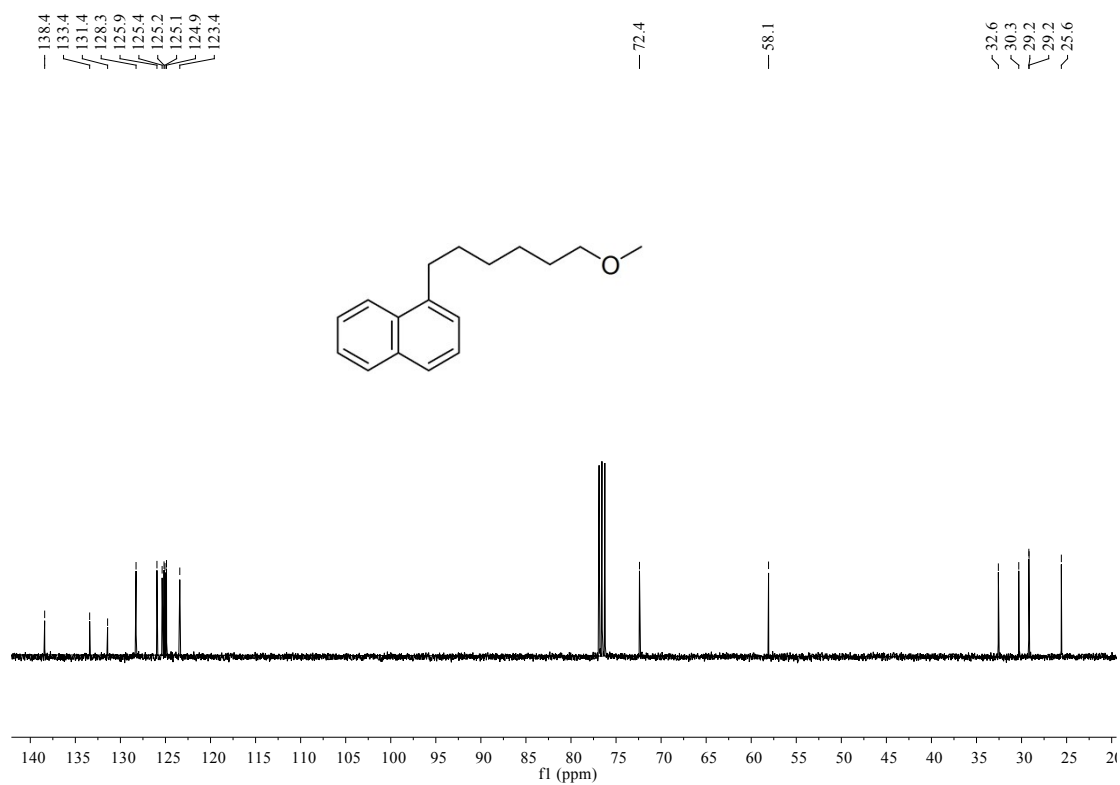

Figure S24. <sup>13</sup>C NMR spectrum of 1-(6-methoxyhexyl)naphthalene (3aj) in CDCl<sub>3</sub>.

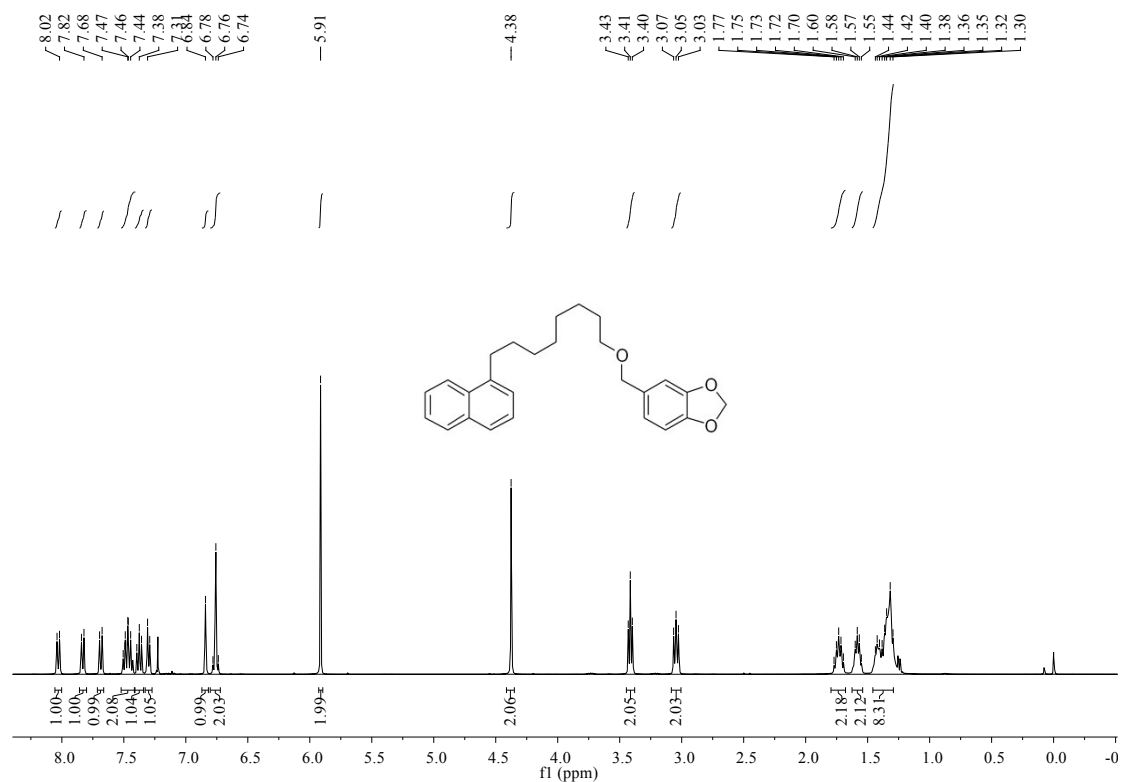

**Figure S25.** <sup>1</sup>H NMR spectrum of 5-(((8-(naphthalen-1-yl)octyl)oxy)methyl)benzo[d][1,3]dioxole (3ak) in CDCl<sub>3</sub>.

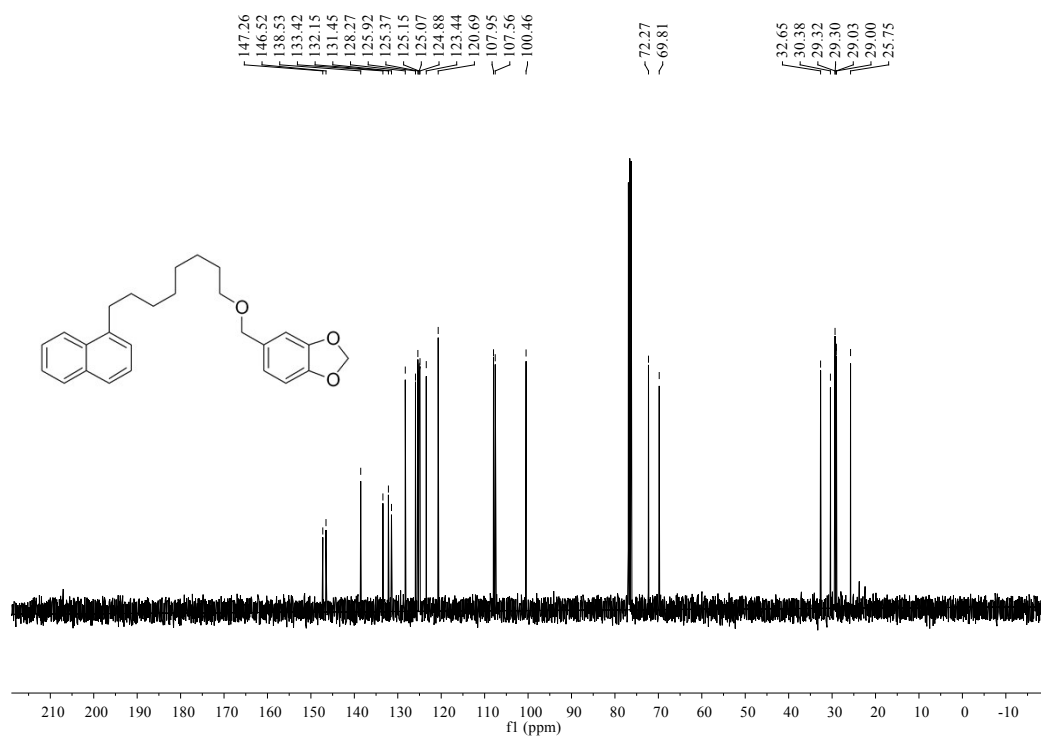

**Figure S26.** <sup>13</sup>C NMR spectrum of 5-(((8-(naphthalen-1-yl)octyl)oxy)methyl)benzo[d][1,3]dioxole (3ak) in CDCl<sub>3</sub>.

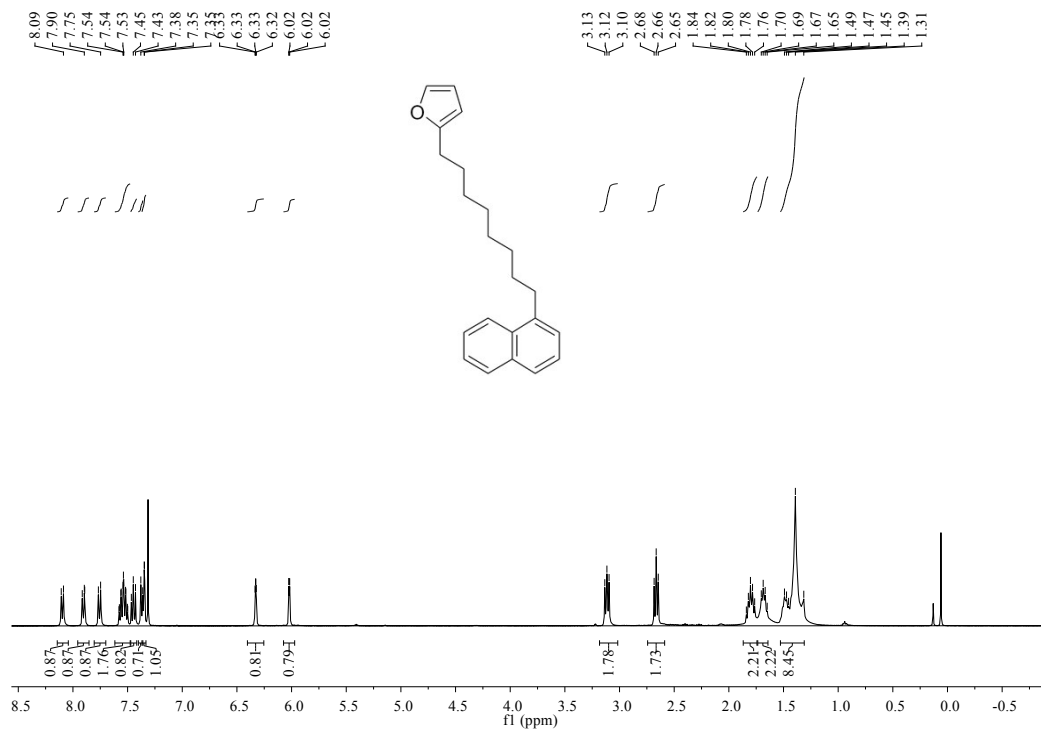

Figure S27. <sup>1</sup>H NMR spectrum of 2-(8-(naphthalen-1-yl)octyl)furan (3a) in CDCl<sub>3</sub>.

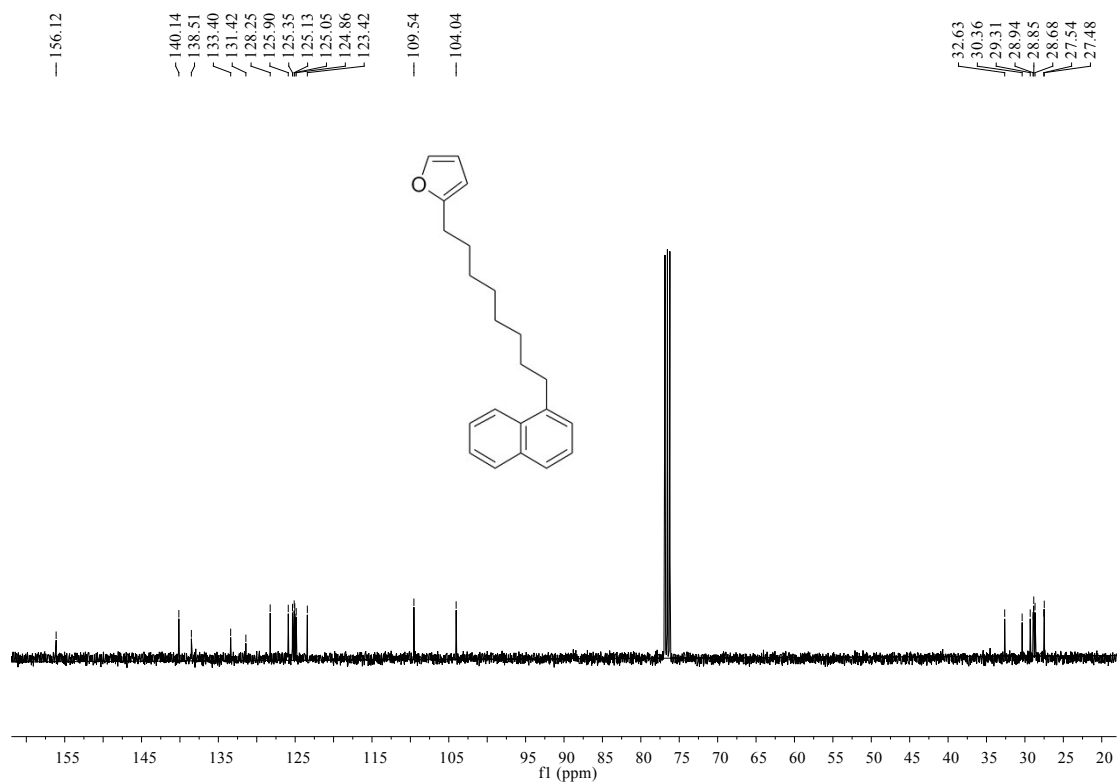

Figure S28. <sup>13</sup>C NMR spectrum of 2-(8-(naphthalen-1-yl)octyl)furan (3a) in

CDCl<sub>3</sub>.

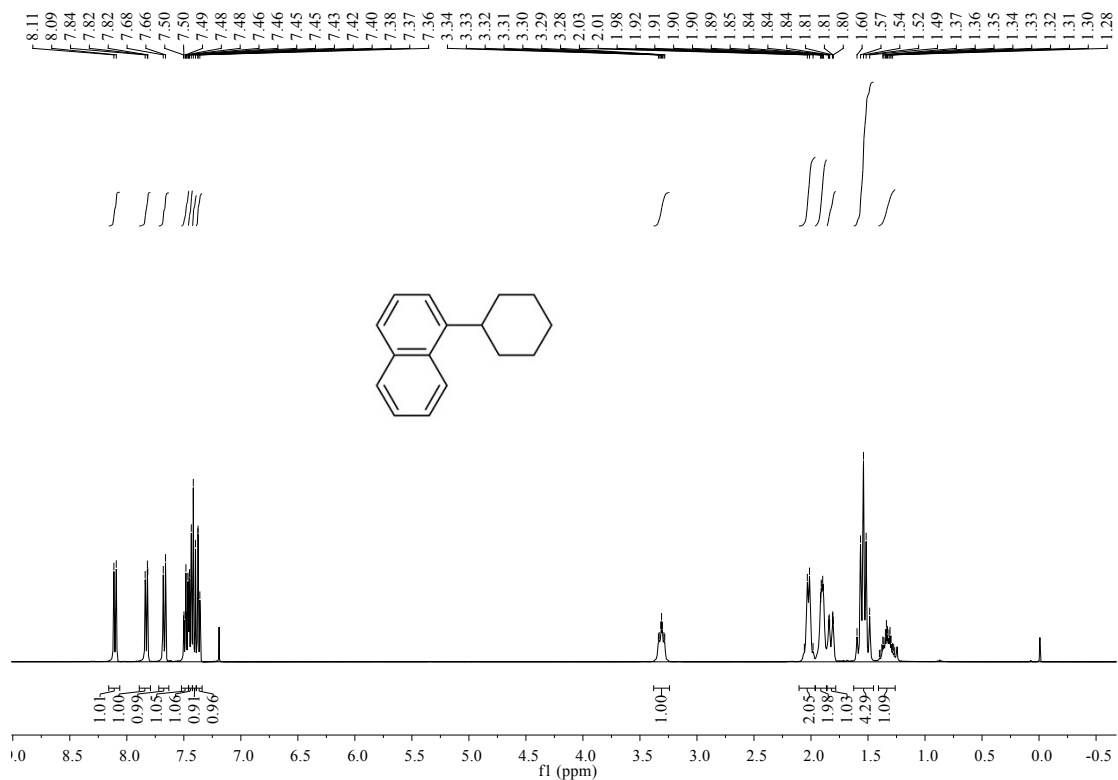

**Figure S29.** <sup>1</sup>H NMR spectrum of 1-cyclohexylnaphthalene (3am) in CDCl<sub>3</sub>.

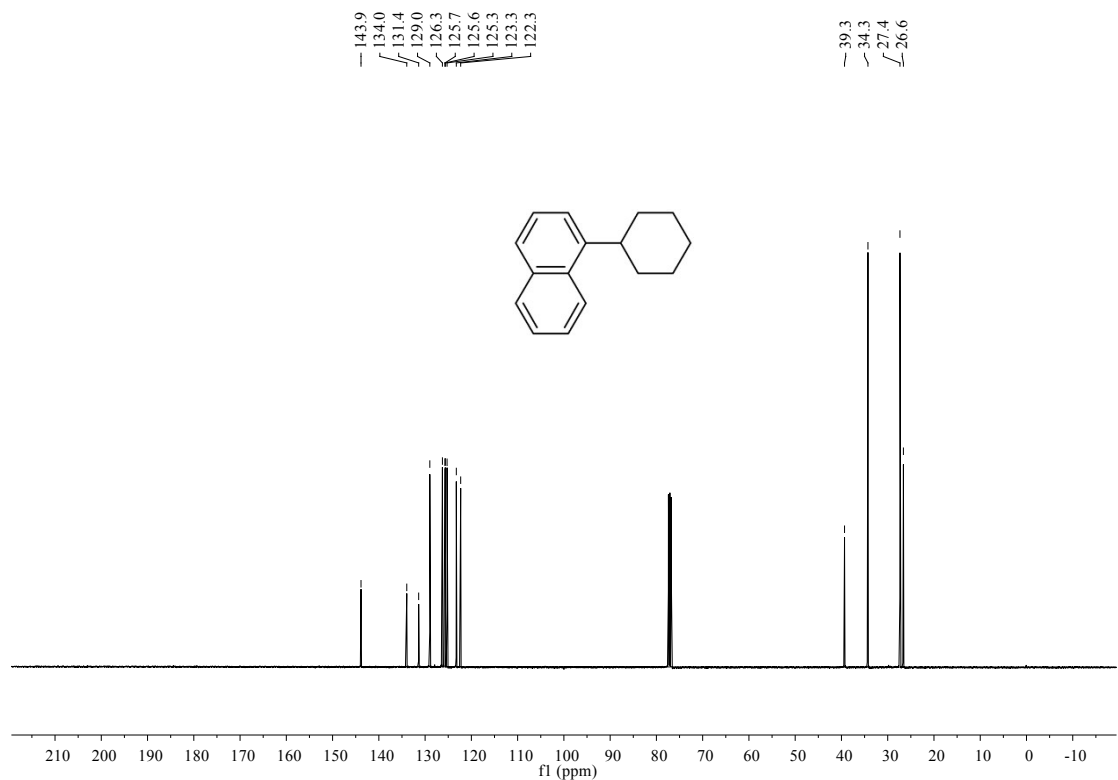

**Figure S30.** <sup>13</sup>C NMR spectrum of 1-cyclohexylnaphthalene (3am) in CDCl<sub>3</sub>.

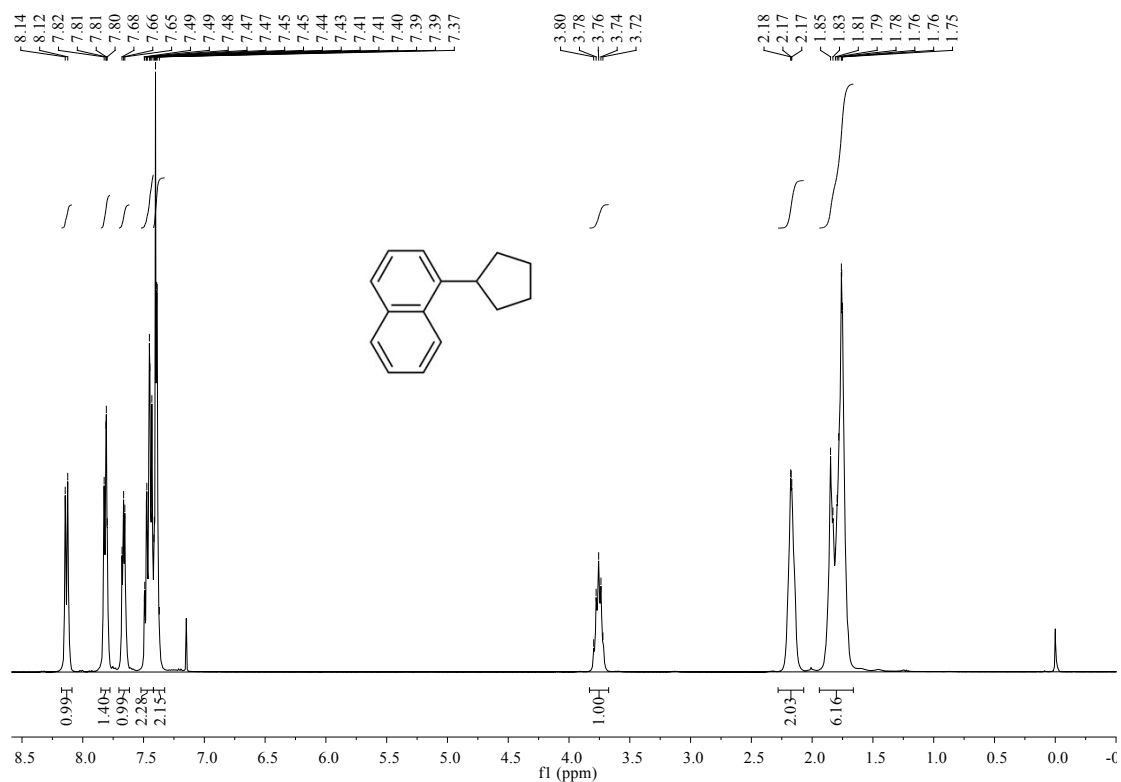

**Figure S31.** <sup>1</sup>H NMR spectrum of 1-cyclopentyl-naphthalene (3an) in CDCl<sub>3</sub>.

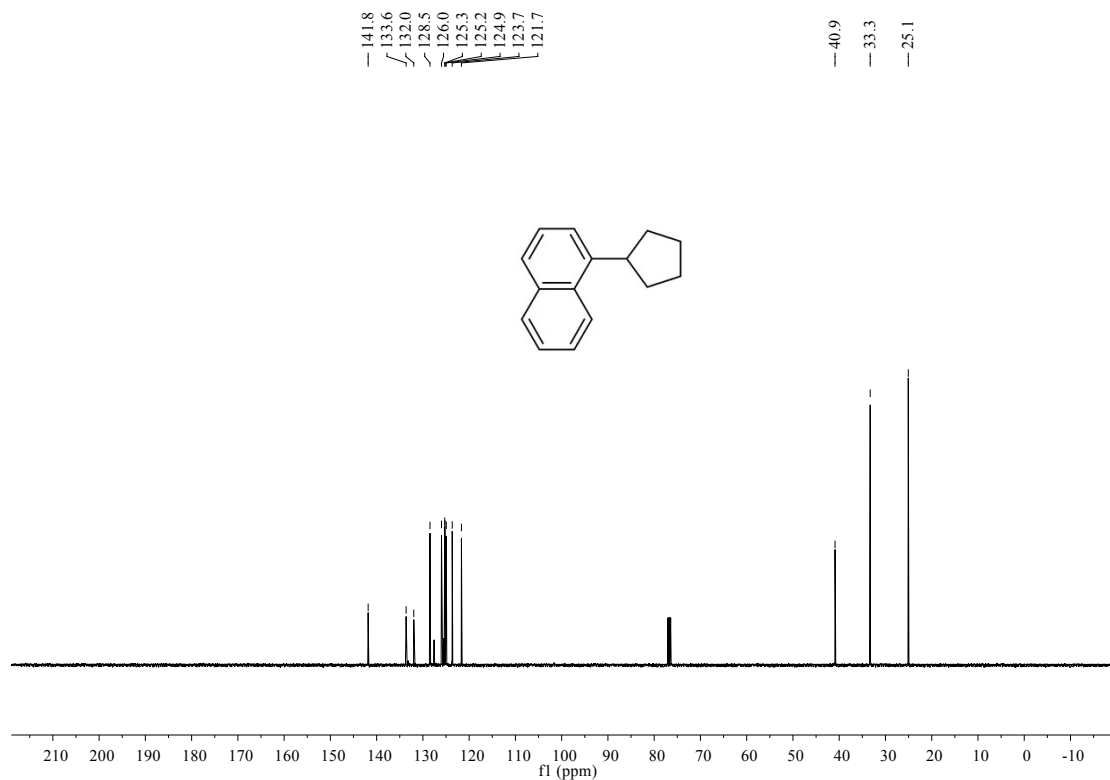

**Figure S32.** <sup>13</sup>C NMR spectrum of 1-cyclopentyl-naphthalene (3an) in CDCl<sub>3</sub>.

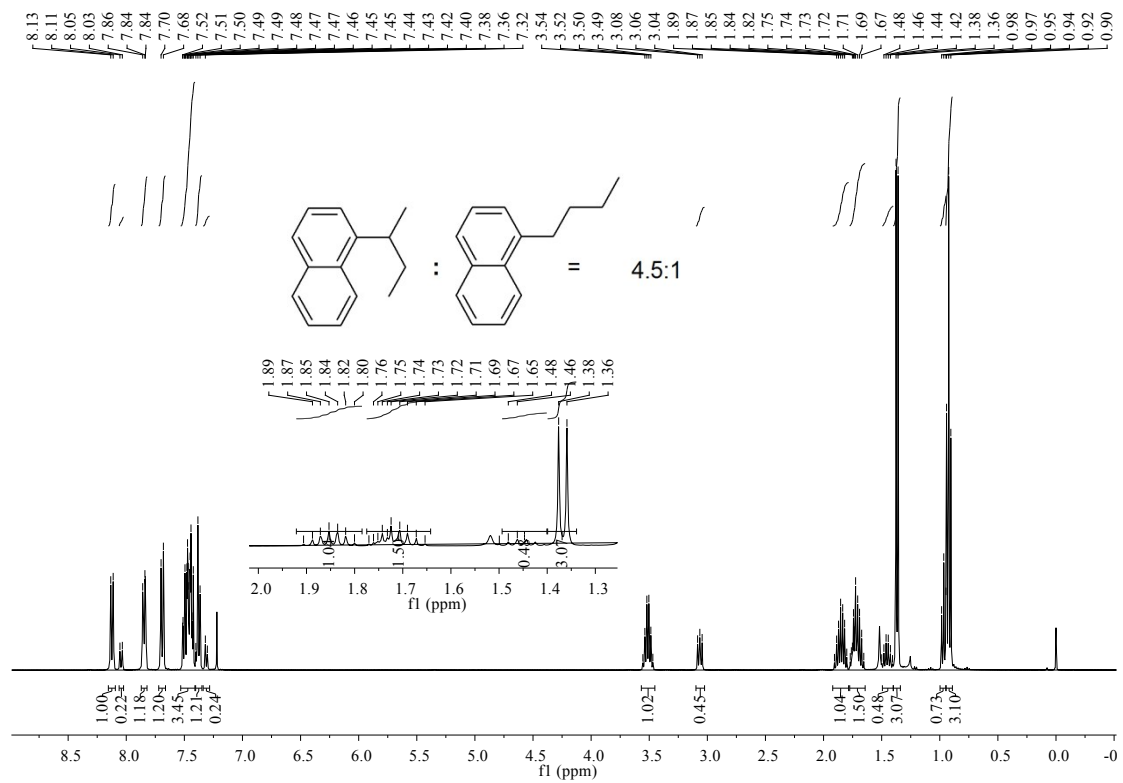

**Figure S33.**  $^1\text{H}$  NMR spectrum of 1-*sec*-butyl-naphthalene (**3ao**) in  $\text{CDCl}_3$ .

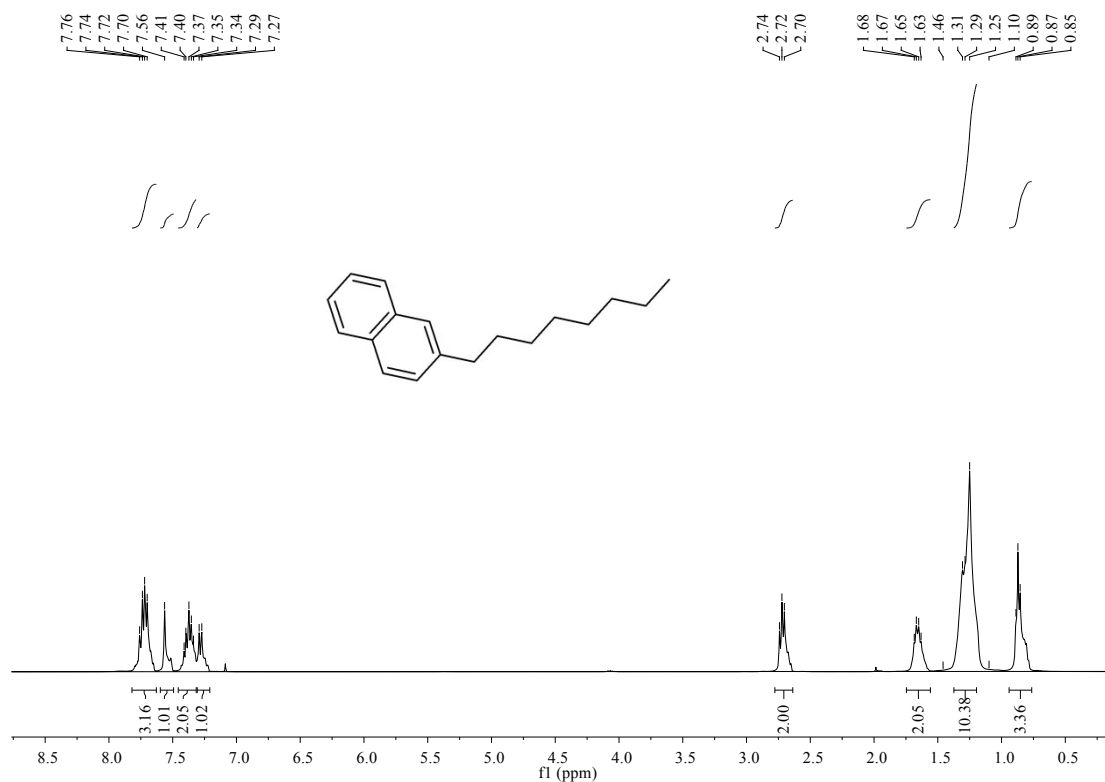

**Figure S34.** <sup>1</sup>H NMR spectrum of 2-octylnaphthalene (3bb) in CDCl<sub>3</sub>.

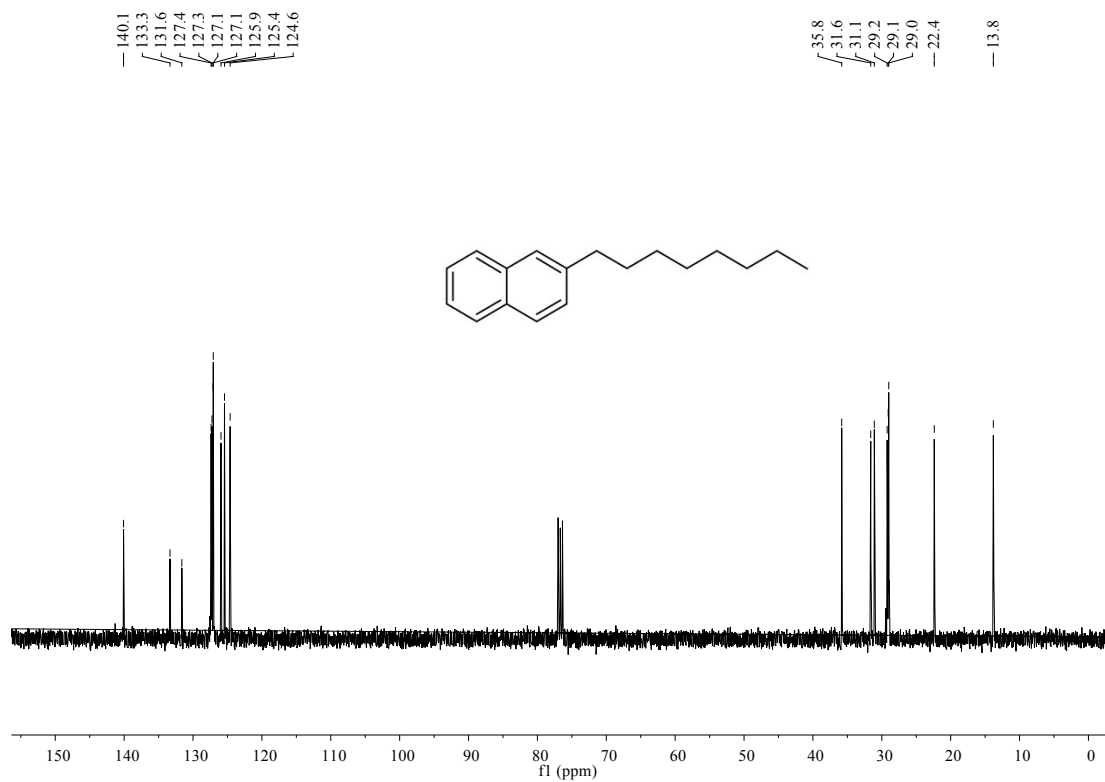

**Figure S35.** <sup>13</sup>C NMR spectrum of 2-octylnaphthalene (3bb) in CDCl<sub>3</sub>.



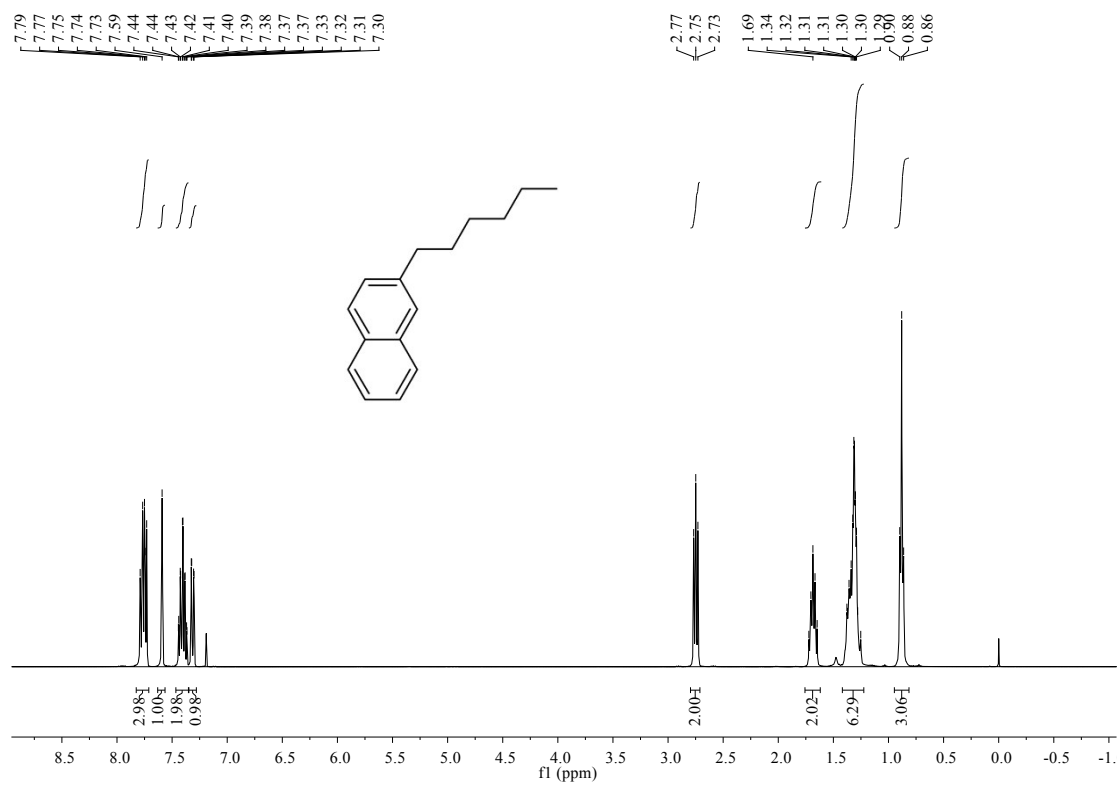

**Figure S36.**  $^1\text{H}$  NMR spectrum of 2-hexylnaphthalene (**3bc**) in  $\text{CDCl}_3$ .

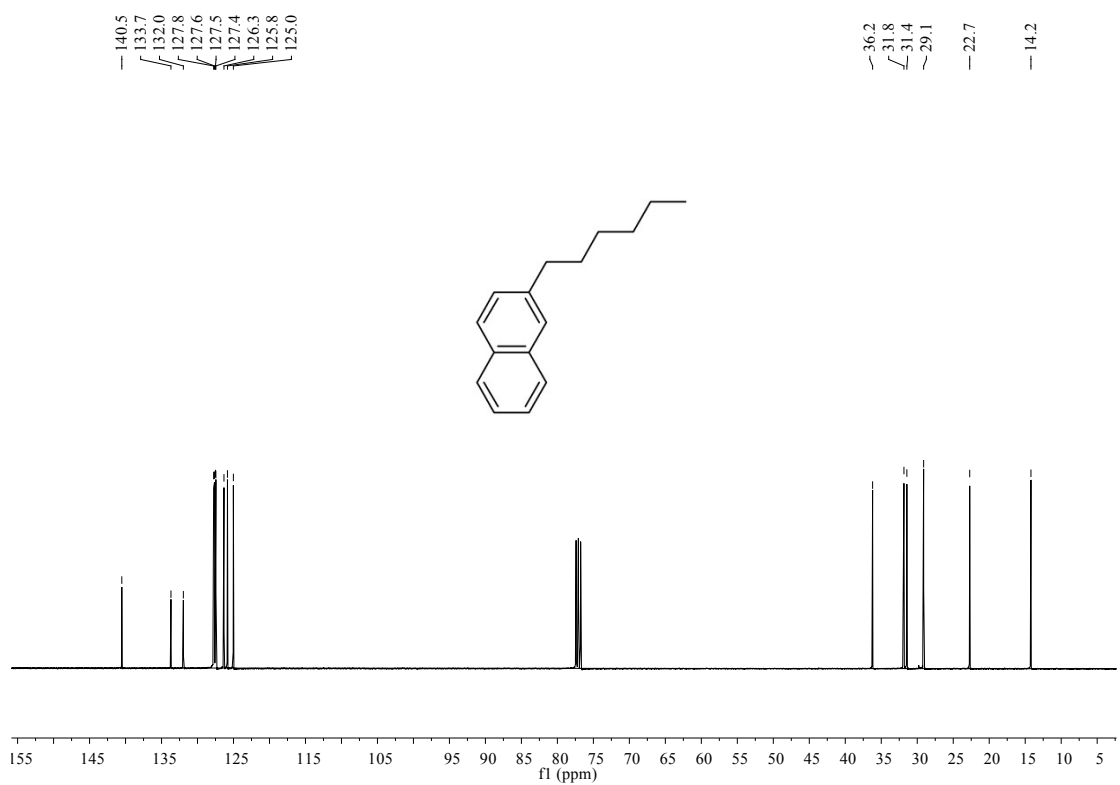

**Figure S37.**  $^{13}\text{C}$  NMR spectrum of 2-hexylnaphthalene (**3bc**) in  $\text{CDCl}_3$ .

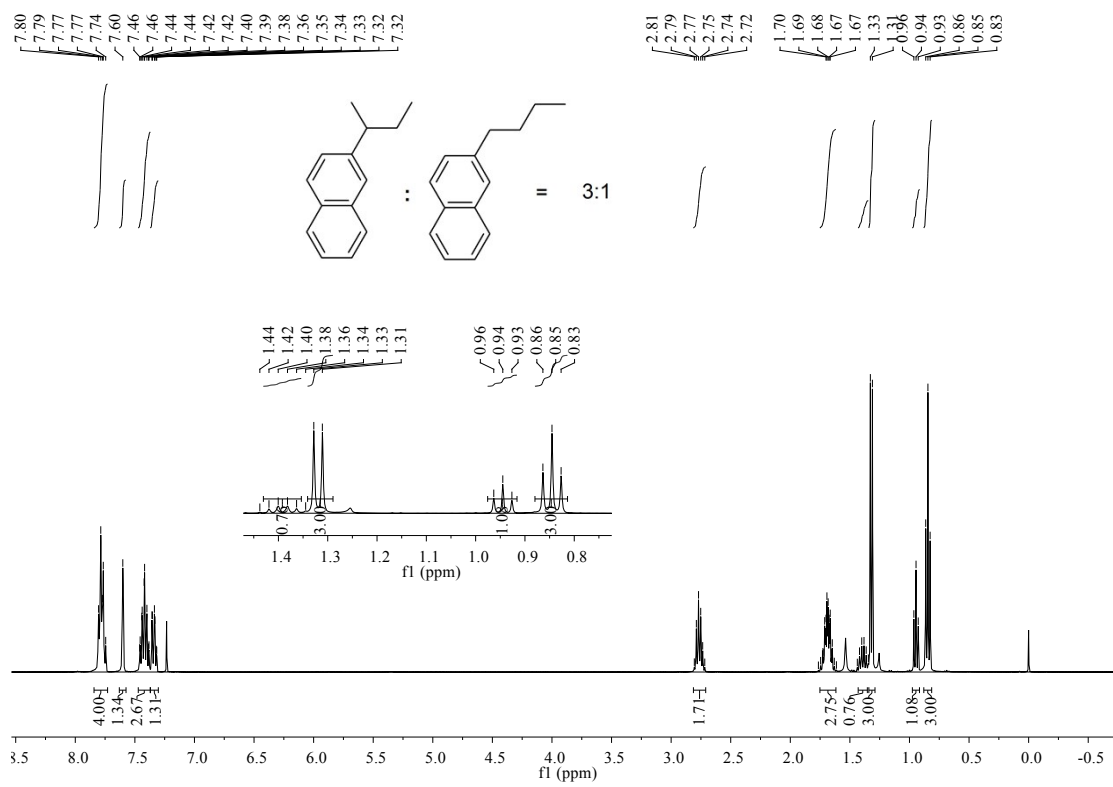

**Figure S38.** <sup>1</sup>H NMR spectrum of 2-sec-butyl-1-naphthalene (**3bo**) in CDCl<sub>3</sub>.

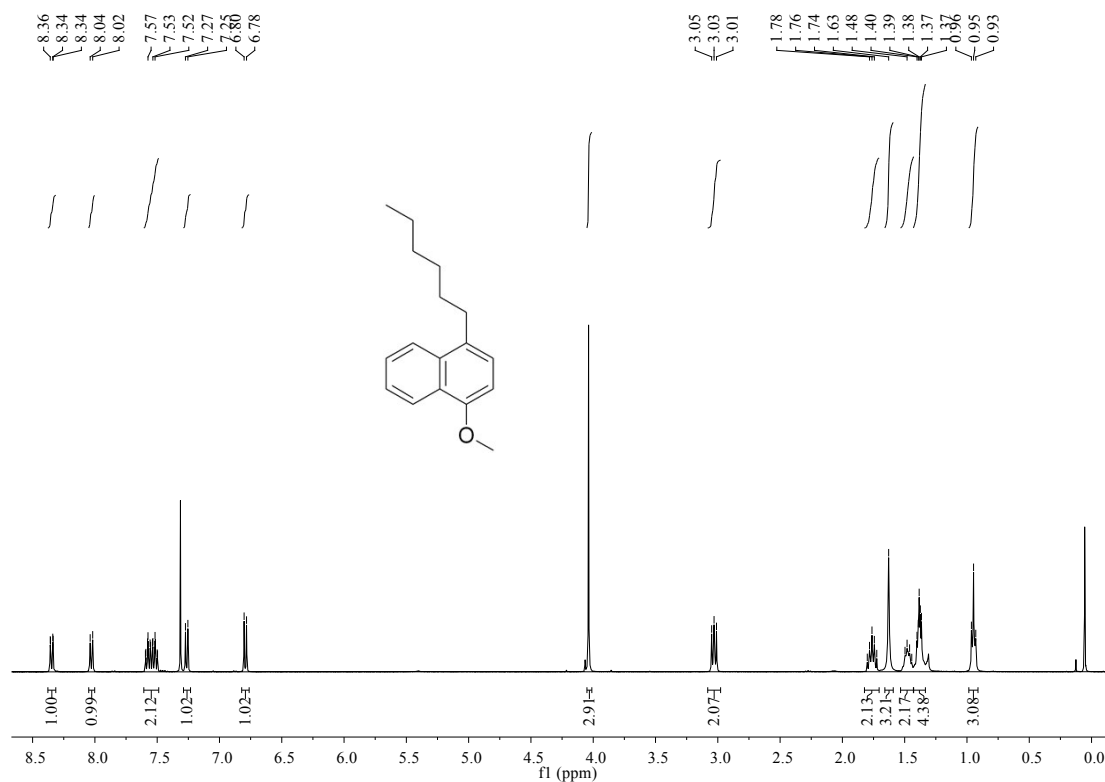

Figure S39.  $^1\text{H}$  NMR spectrum of 1-hexyl-4-methoxynaphthalene (3cc) in  $\text{CDCl}_3$ .

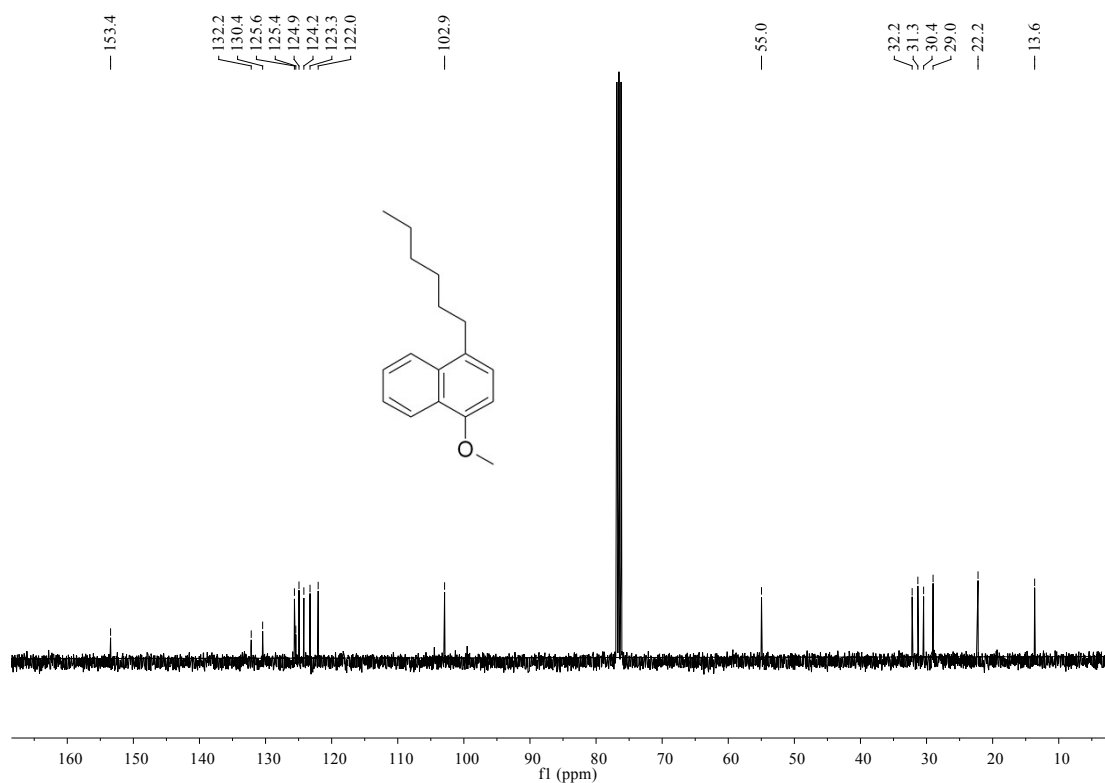

Figure S40.  $^{13}\text{C}$  NMR spectrum of 1-hexyl-4-methoxynaphthalene (3cc) in  $\text{CDCl}_3$ .

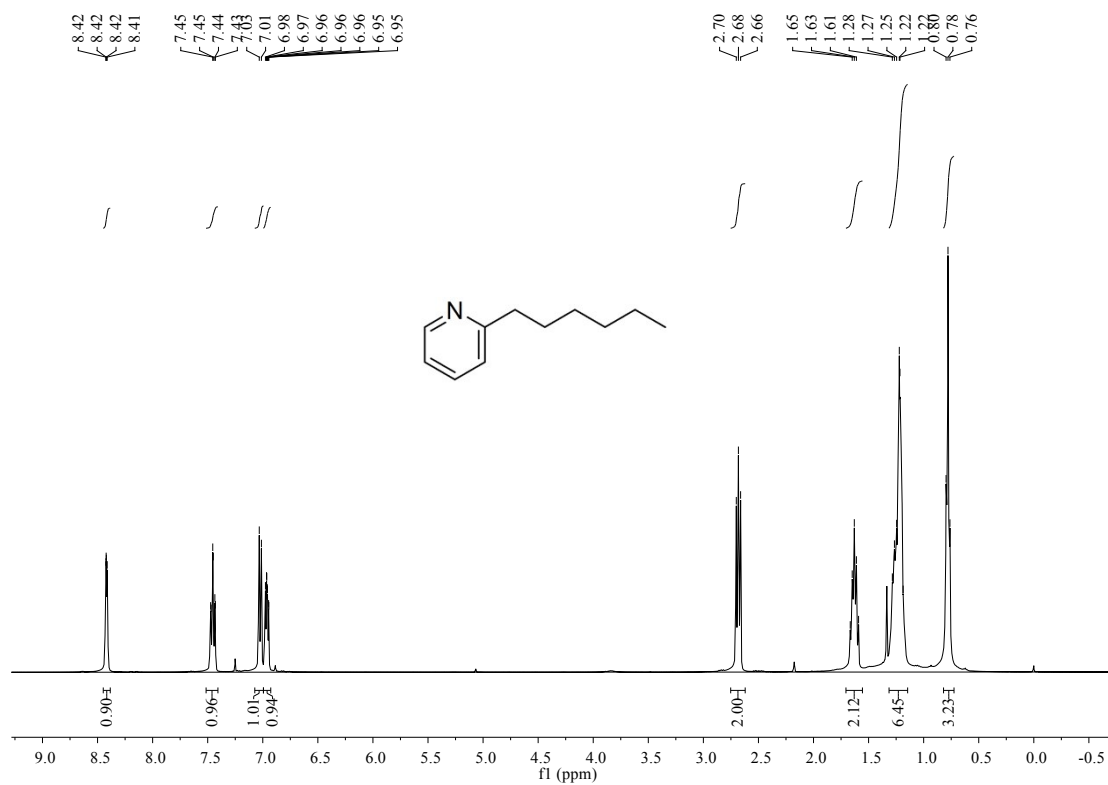

Figure S41. <sup>1</sup>H NMR spectrum of 2-hexylpyridine (3dc) in CDCl<sub>3</sub>.

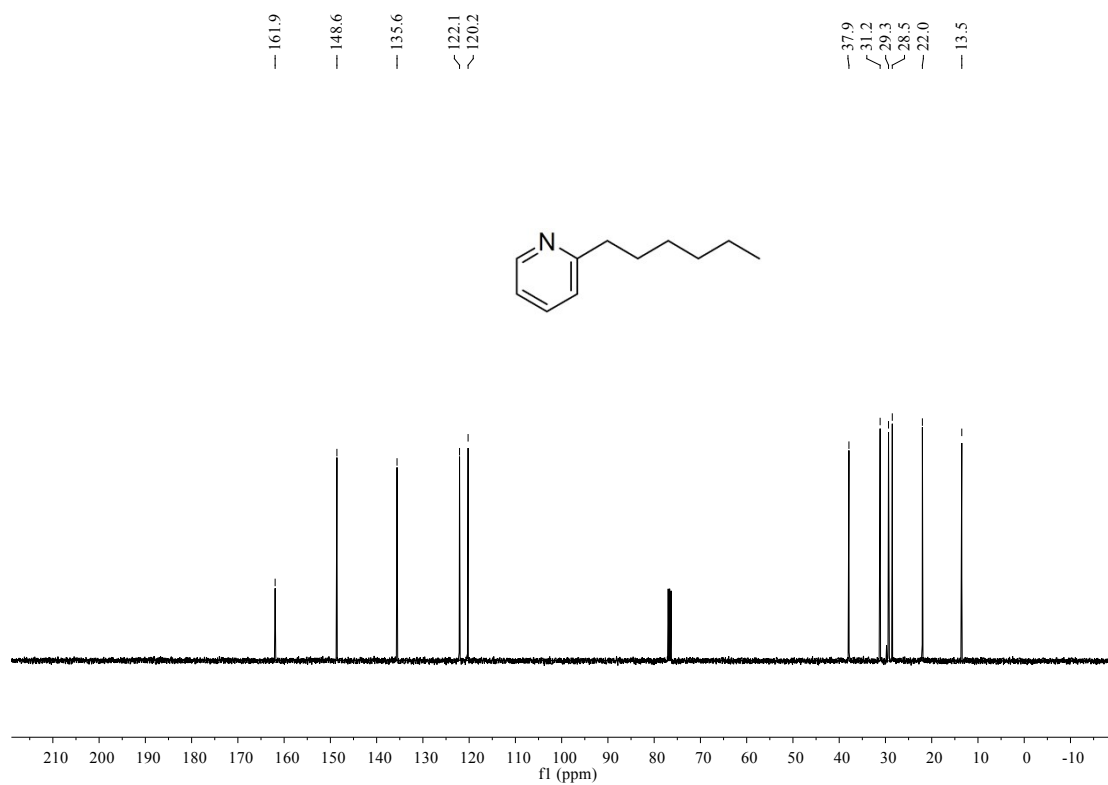

Figure S42. <sup>13</sup>C NMR spectrum of 2-hexylpyridine (3dc) in CDCl<sub>3</sub>.

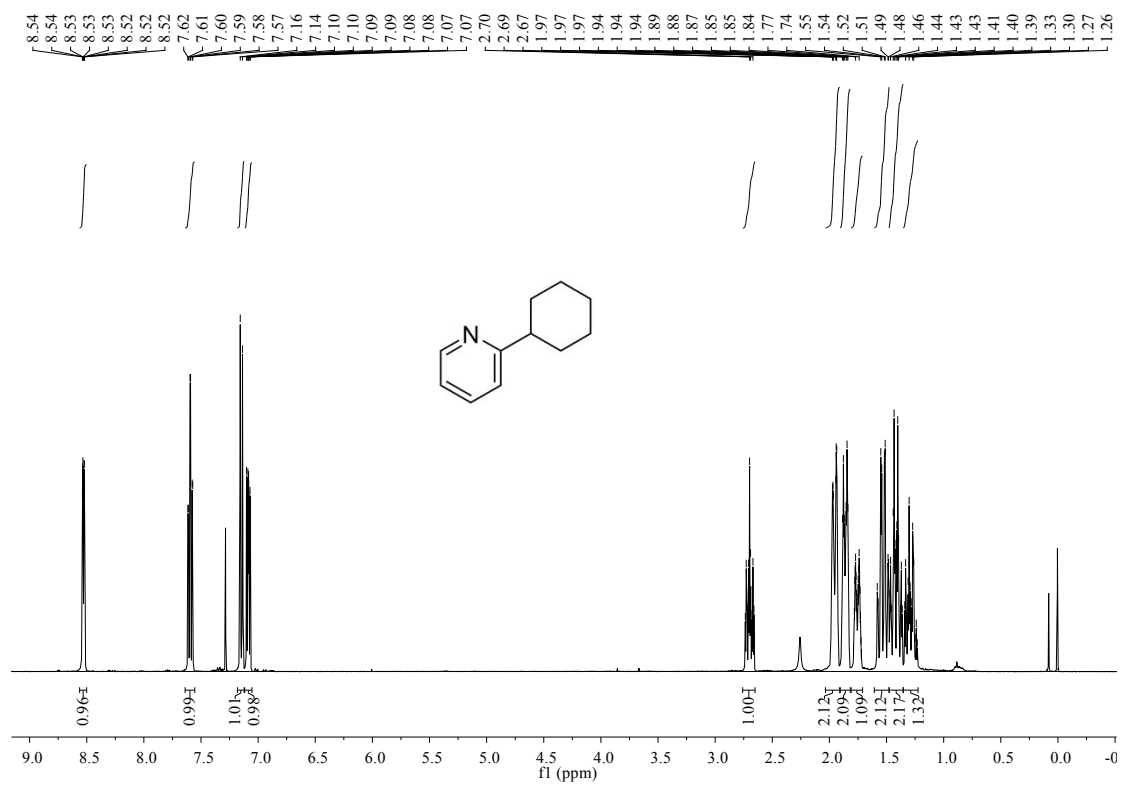

Figure S43. <sup>1</sup>H NMR spectrum of 2-cyclohexylpyridine (3dm) in CDCl<sub>3</sub>.

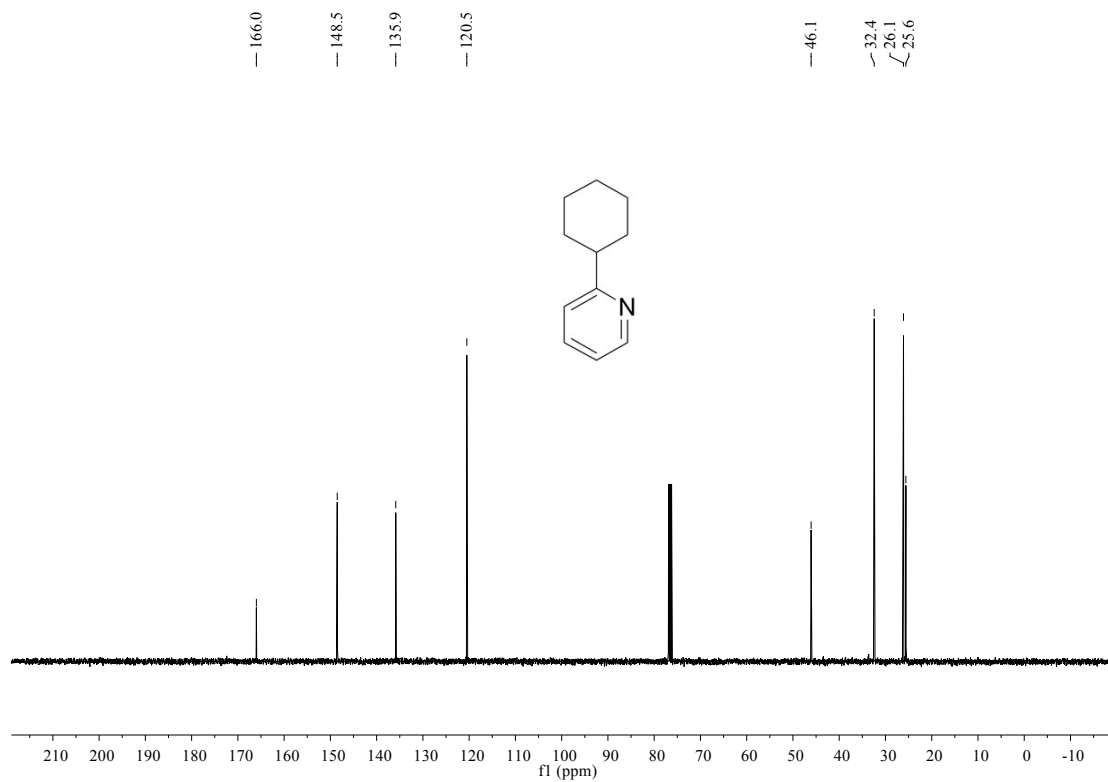

Figure S44. <sup>13</sup>C NMR spectrum of 2-cyclohexylpyridine (3dm) in CDCl<sub>3</sub>.

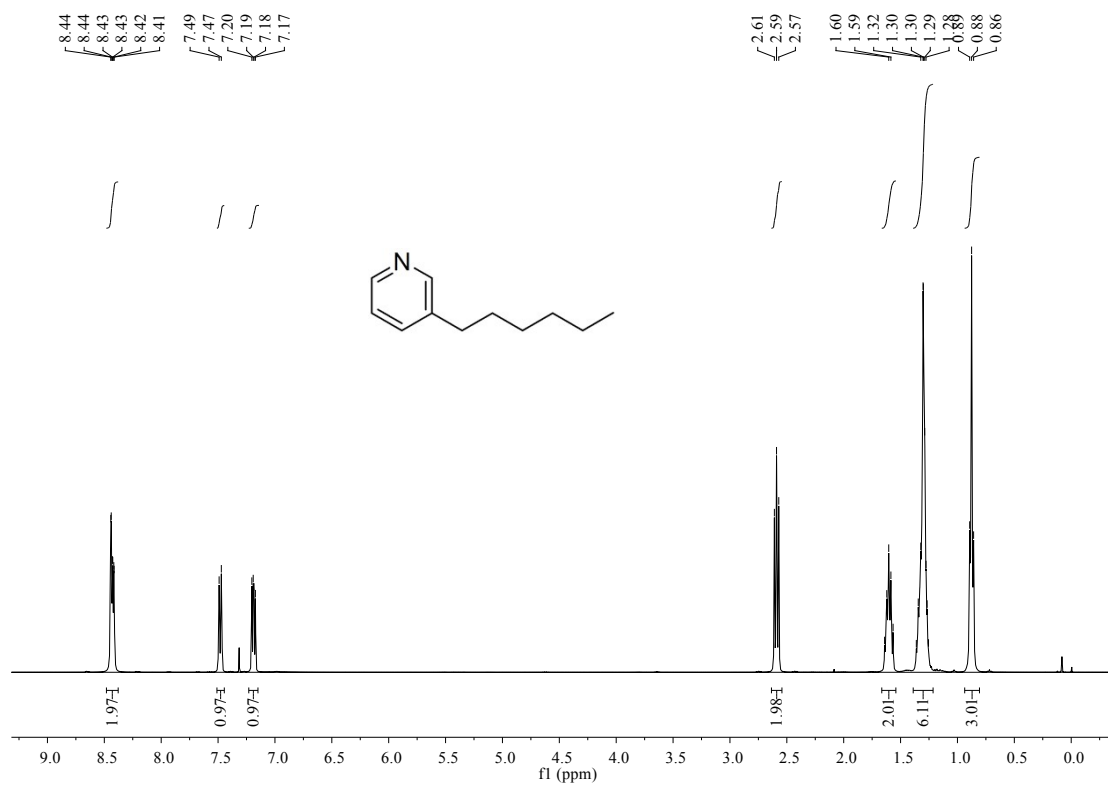

Figure S45. <sup>1</sup>H NMR spectrum of 3-hexylpyridine (3ec) in CDCl<sub>3</sub>.

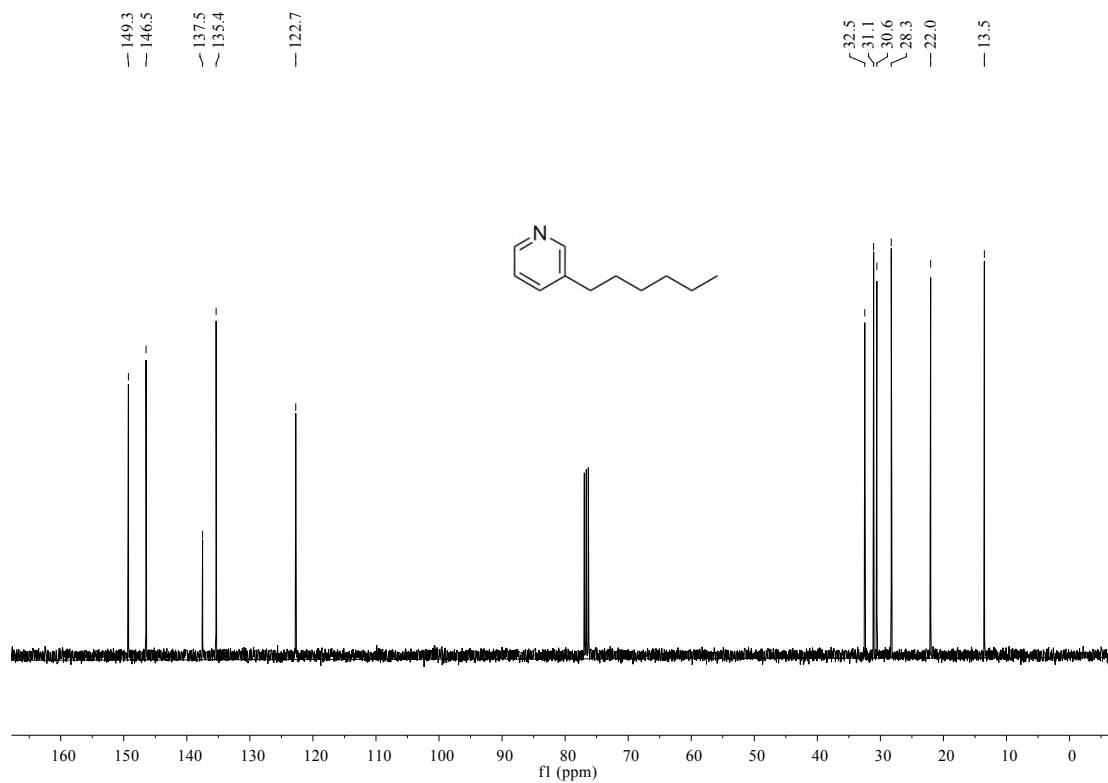

Figure S46. <sup>13</sup>C NMR spectrum of 3-hexylpyridine (3ec) in CDCl<sub>3</sub>.

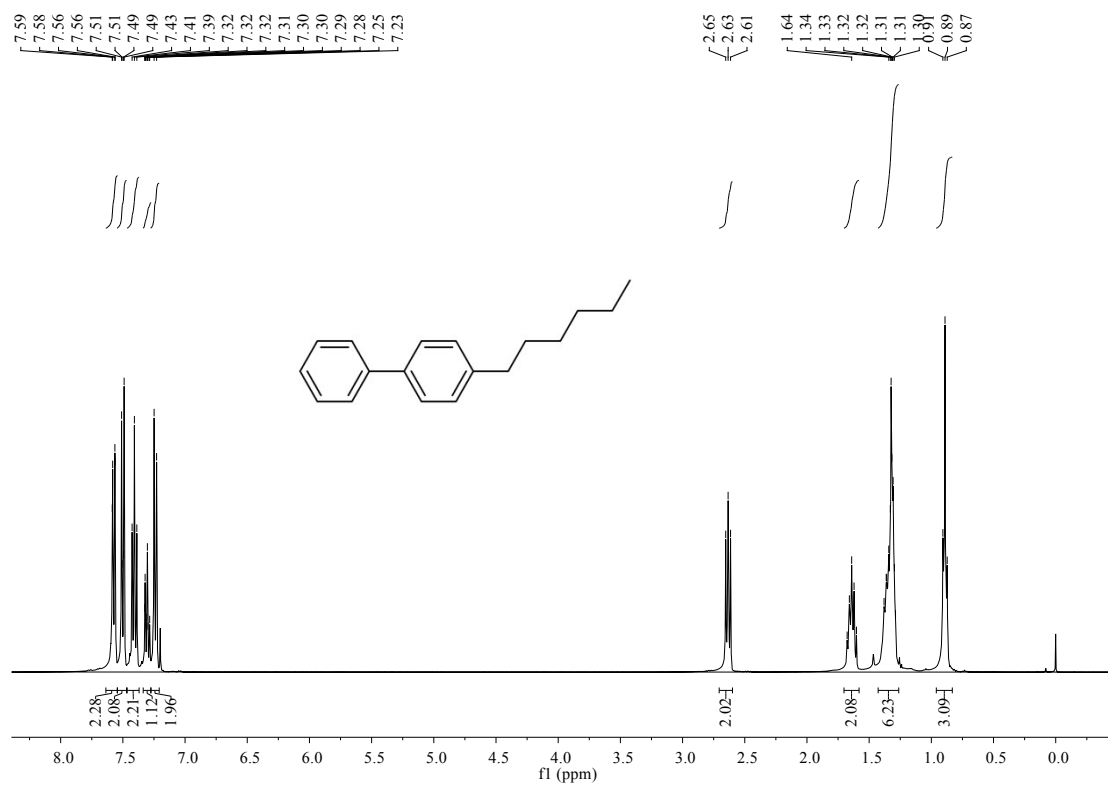

**Figure S47.** <sup>1</sup>H NMR spectrum of 4-hexyl-1,1'-Biphenyl (3fc) in CDCl<sub>3</sub>.

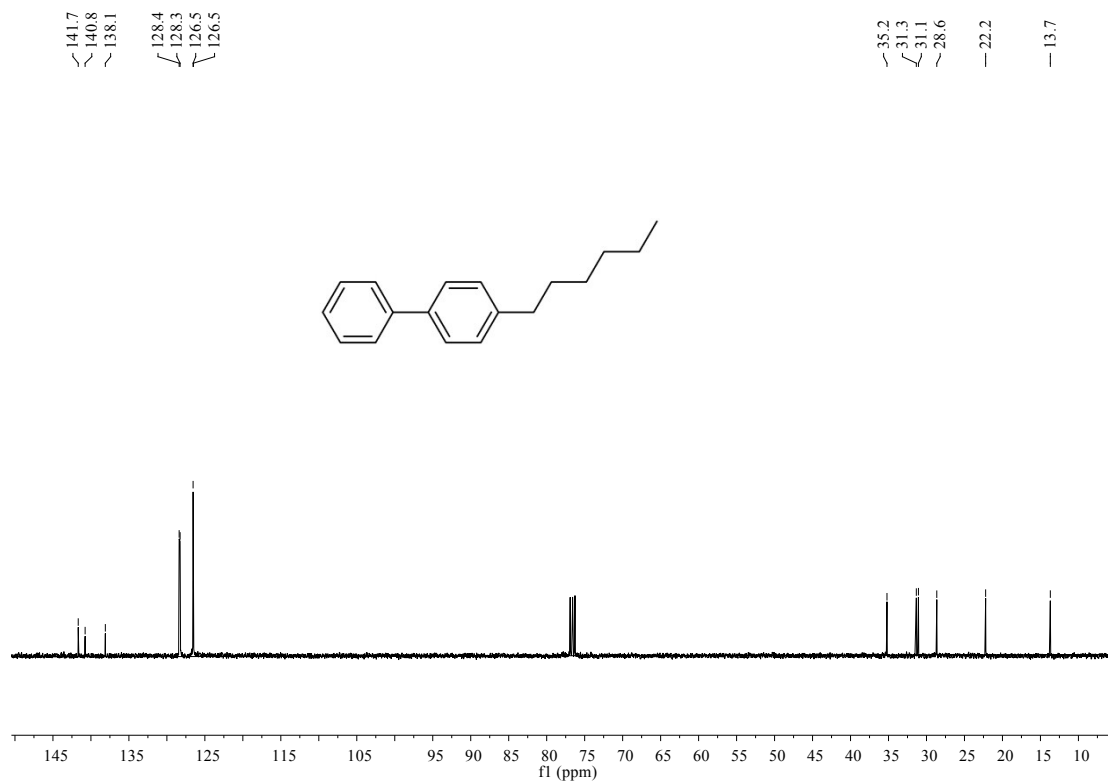

**Figure S48.** <sup>13</sup>C NMR spectrum of 4-hexyl-1,1'-Biphenyl (3fc) in CDCl<sub>3</sub>.

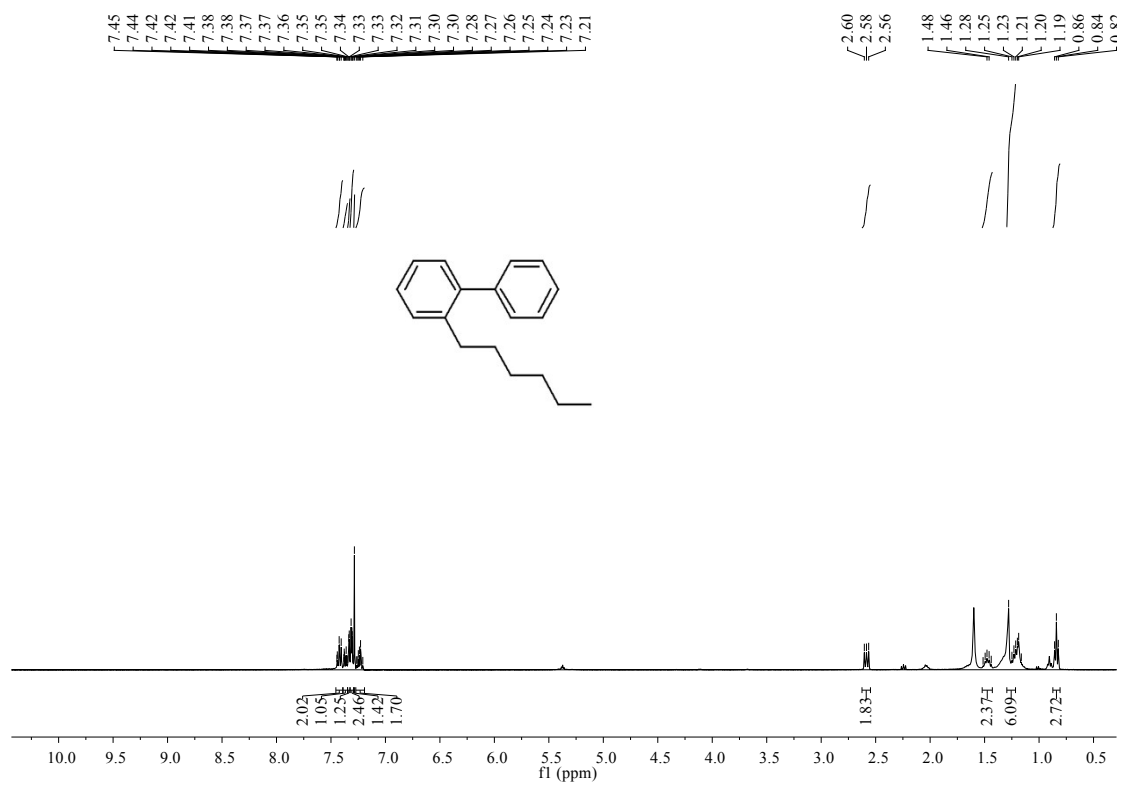

**Figure S49.** <sup>1</sup>H NMR spectrum of 2-hexyl-1,1'-Biphenyl (3gc) in CDCl<sub>3</sub>.

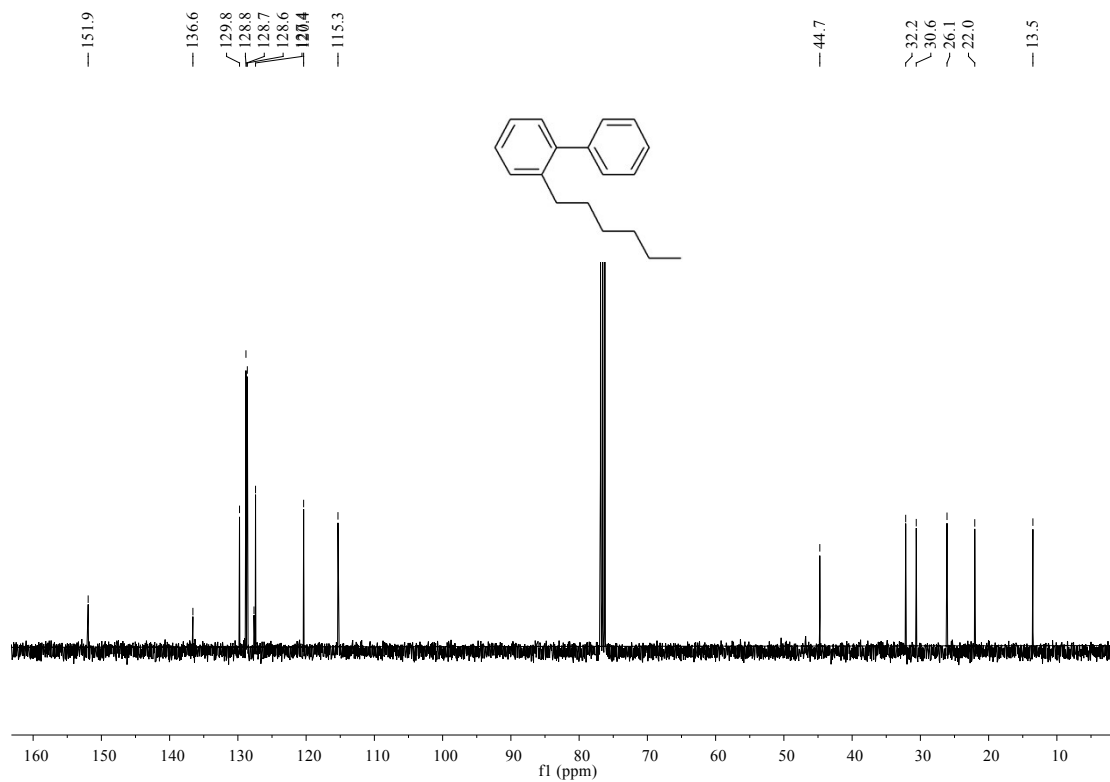

**Figure S50.** <sup>13</sup>C NMR spectrum of 2-hexyl-1,1'-Biphenyl (3gc) in CDCl<sub>3</sub>.



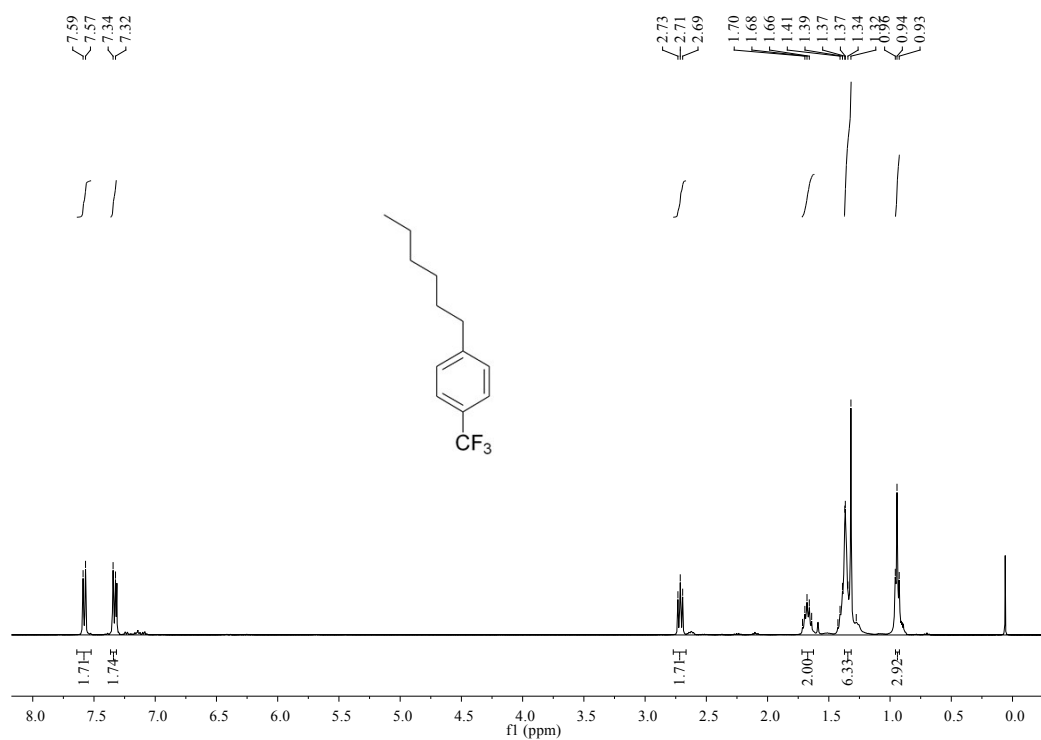

**Figure S51.** <sup>1</sup>H NMR spectrum of 1-hexyl-4-(trifluoromethyl)benzene (**3hc**) in CDCl<sub>3</sub>.

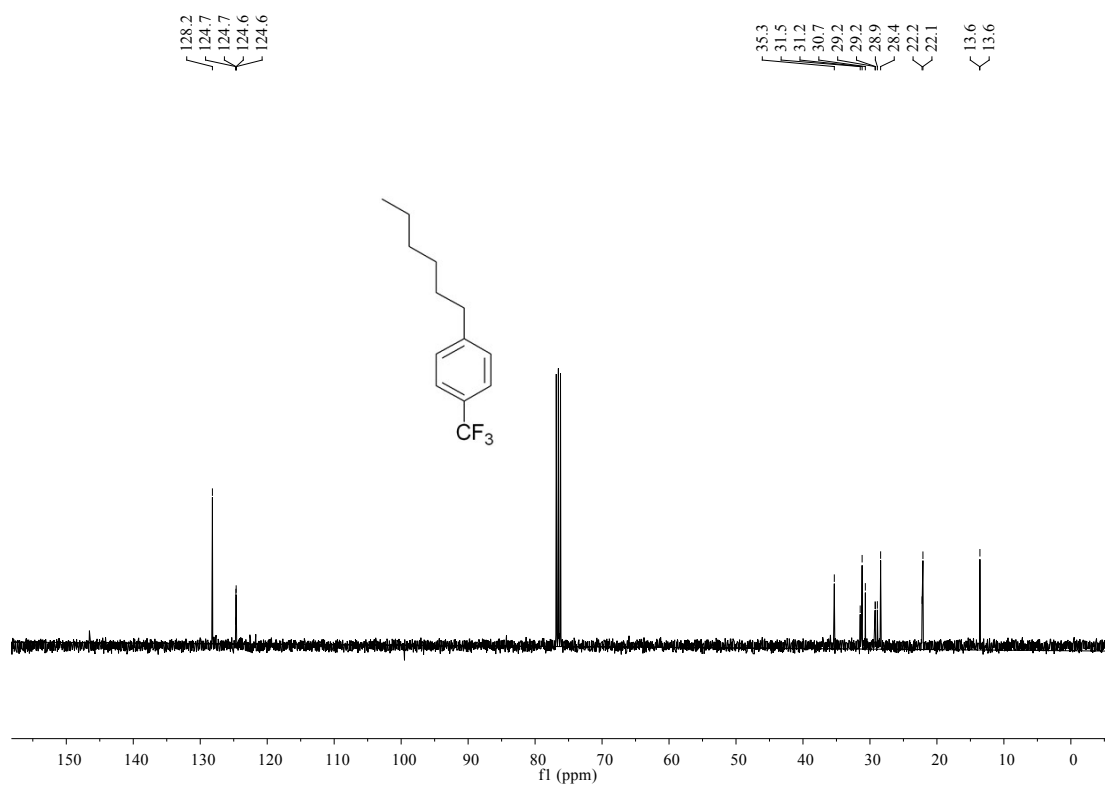

**Figure S52.** <sup>13</sup>C NMR spectrum of 1-hexyl-4-(trifluoromethyl)benzene (**3hc**) in CDCl<sub>3</sub>.

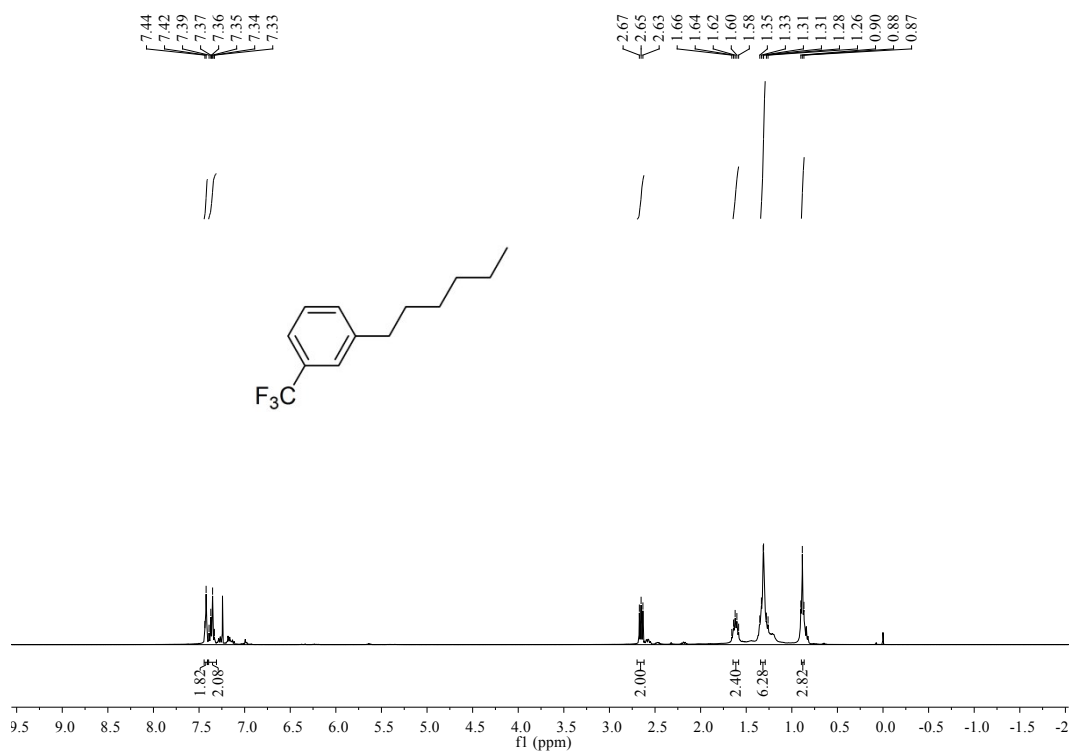

**Figure S53.** <sup>1</sup>H NMR spectrum of 1-(trifluoromethyl)-3-hexylbenzene (3ic) in CDCl<sub>3</sub>.

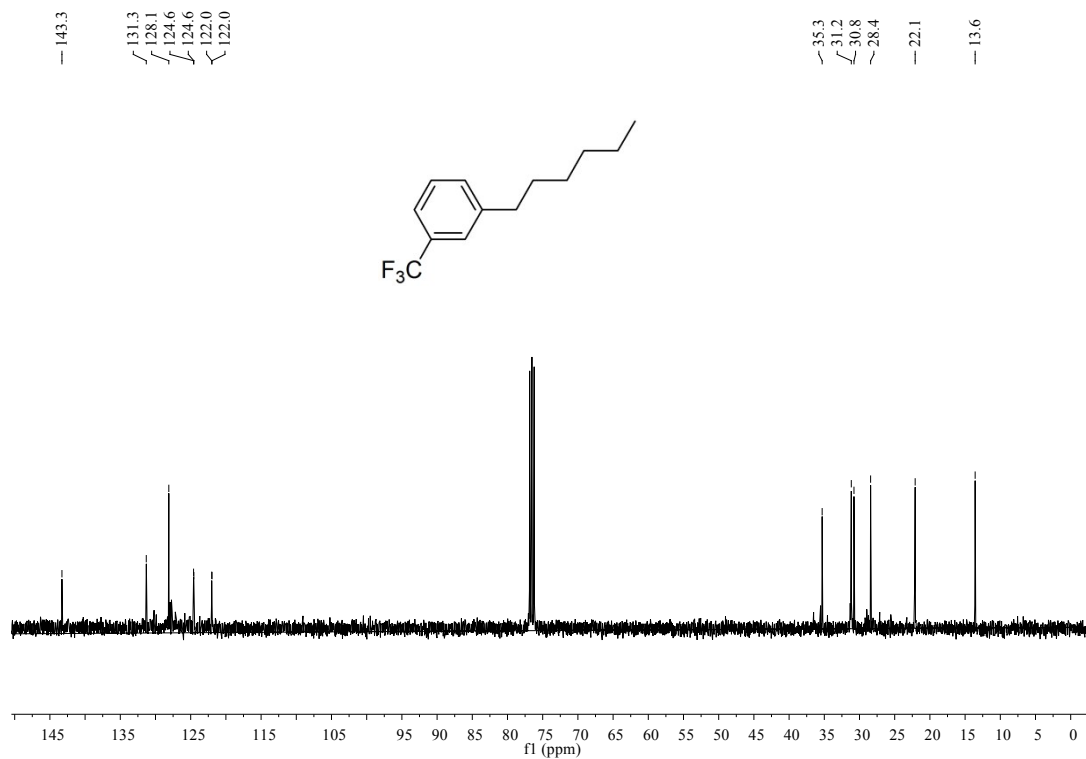

**Figure S54.** <sup>13</sup>C NMR spectrum of 1-(trifluoromethyl)-3-hexylbenzene (3ic) in CDCl<sub>3</sub>.

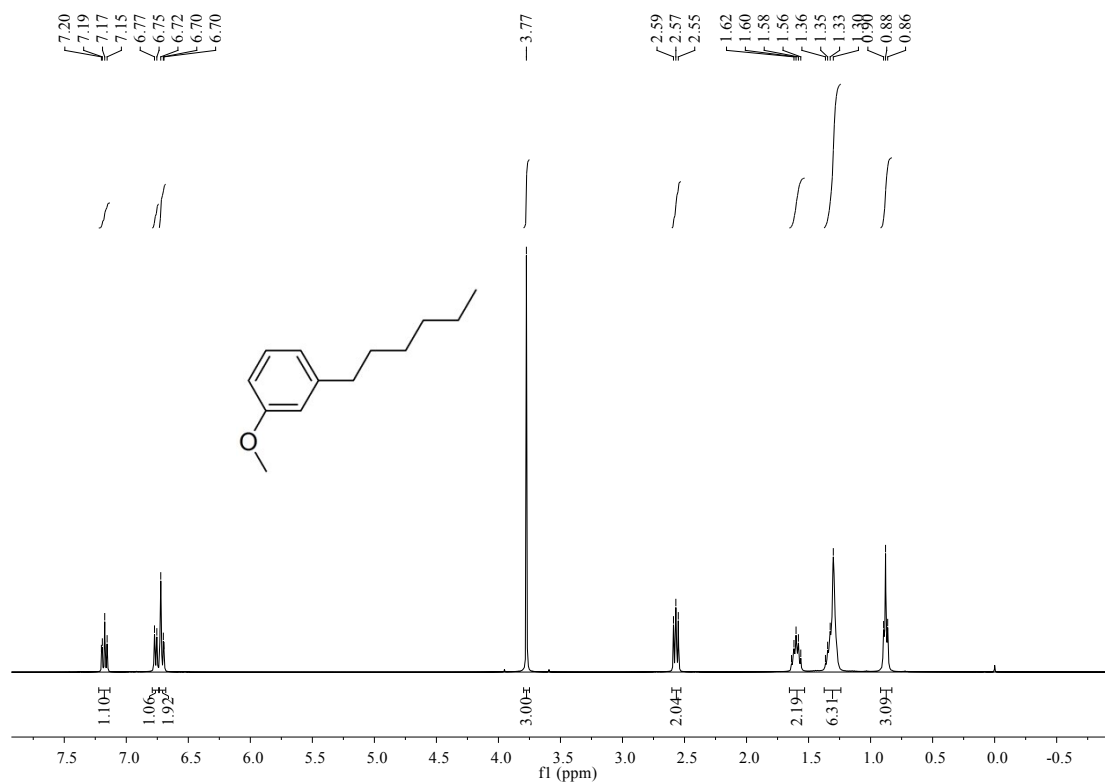

Figure S55. <sup>1</sup>H NMR spectrum of 1-hexyl-3-methoxybenzene (3jc) in CDCl<sub>3</sub>.

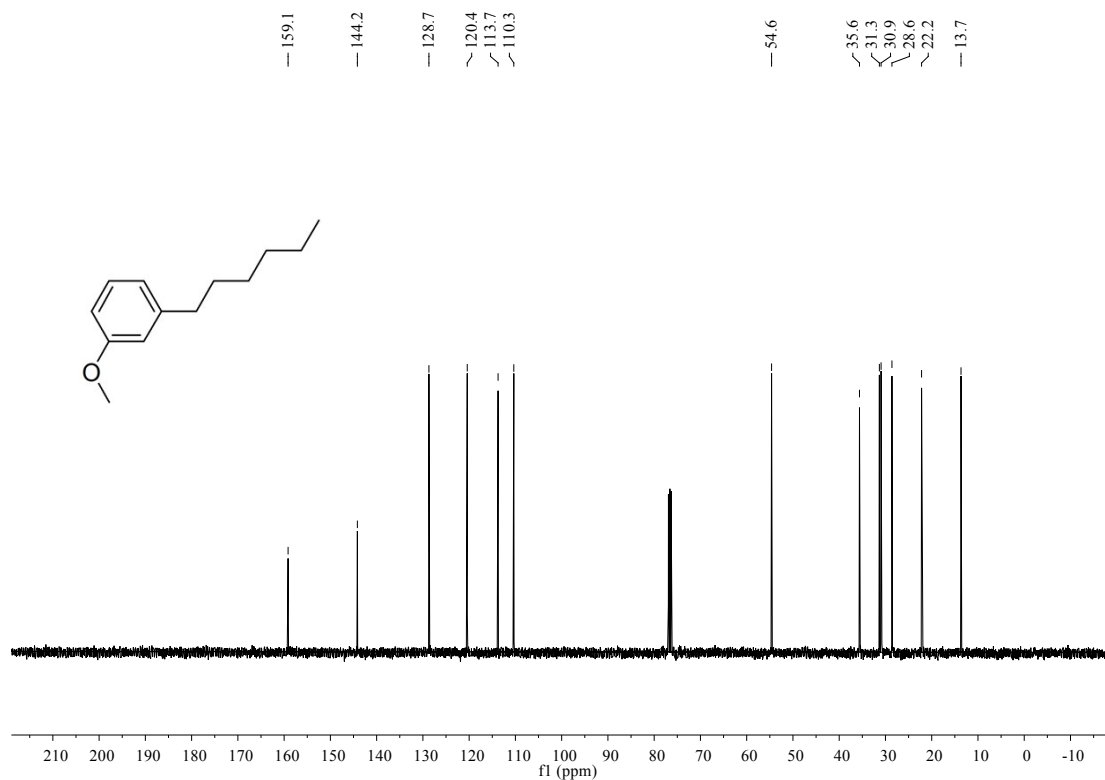

Figure S56. <sup>13</sup>C NMR spectrum of 1-hexyl-3-methoxybenzene (3jc) in CDCl<sub>3</sub>.

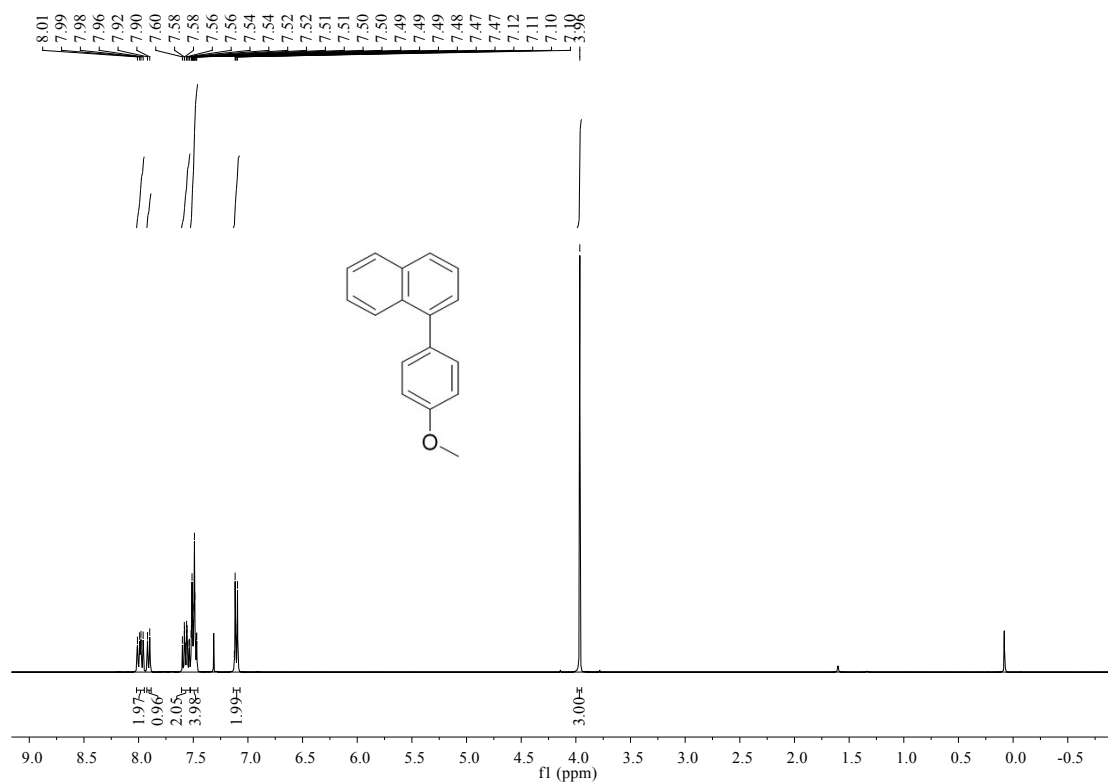

Figure S57. <sup>1</sup>H NMR spectrum of 1-(4-methoxyphenyl)naphthalene (3aq) in CDCl<sub>3</sub>.

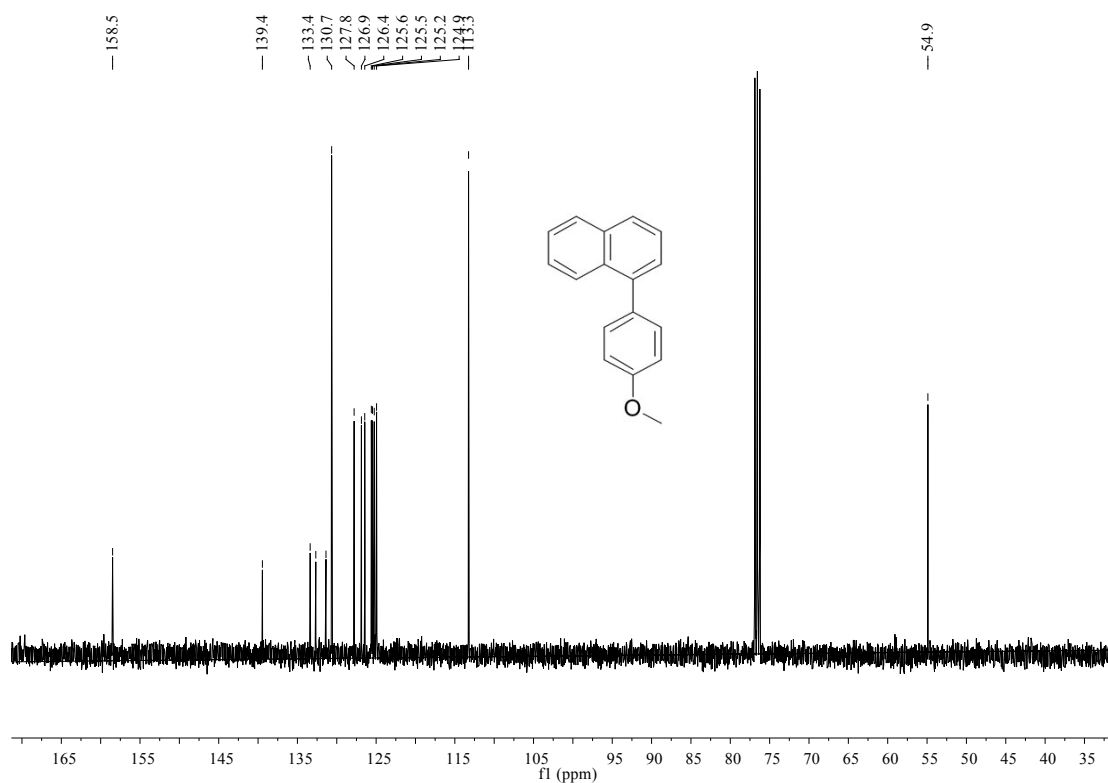

Figure S58. <sup>13</sup>C NMR spectrum of 1-(4-methoxyphenyl)naphthalene (3aq) in CDCl<sub>3</sub>.

## REFERENCES

- 1 H. H. Gao, C. H. Yan, X. P. Tao, Y. Xia, H. M. Sun, Q. Shen and Y. Zhang, *Organometallics*, 2010, **29**, 4189–4192.
- 2 B. Shrestha, S. Thapa, S. K. Gurung, R. A. S. Pike and R. Giri, *J. Org. Chem.*, 2016, **81**, 787–802.
- 3 S. Luo, D. G. Yu, R. Y. Zhu, X. Wang, L. Wang and Z. J. Shi, *Chem. Commun.*, 2013, **49**, 7794–7796.
- 4 X. Q. Liu, C.-C. Hsiao, I. Kalvet, M. Leiendecker, L. Guo, F. Schoenebeck and M. Rueping, *Angew. Chem. Int. Ed.*, 2016, **55**, 6093–6098.
- 5 A. L. Silberstein, S. D. Ramgren and N. K. Garg, *Org. Lett.*, 2012, **14**, 3796–3799.
- 6 Z. Z. Zong, W. X. Wang, X. H. Bai, H. Xi and Z. P. Li, *Asian J. Org. Chem.*, 2015, **4**, 622–625.
- 7 T. Takeda, Y. Takeda and A. Tsubouchi, *Chem. Lett.*, 2015, **44**, 809–811.
- 8 Z. L. Liu, N. N. Dong, M. Z. Xu, Z. M. Sun and T. Tu, *J. Org. Chem.*, 2013, **78**, 7436–7444.
- 9 S. F. Zhu, Y. L. Xiao, Z. J. Guo and H. F. Jiang, *Org. Lett.*, 2013, **15**, 898–901.
- 10 P. C. Too, G. H. Chan, Y. L. Tnay, H. Hirao and S. Chiba, *Angew. Chem.*, 2016, **128**, 3783 – 3787.
- 11 S. H. Teo, Z. Q. Weng and T. S. A. Hor, *J. Organometallic Chem.*, 2011, **696**, 2928–2934.
- 12 X. Wang, Y. Xu, F. Y. Mo, G. J. Ji, D. Qiu, J. J. Feng, Y. X. Ye, S. N. Zhang, Y. Zhang and J. B. Wang, *J. Am. Chem. Soc.*, 2013, **135**, 10330–10333.
- 13 I. Stibingerova, S. Voltrova, S. Kocova, M. Lindale and J. Srogl, *Org. Lett.*, 2016, **18**, 312–315.
